# Supplementary material for: Evaluation of Genomic Contamination Detection Tools and Influence of Horizontal Gene Transfer on Their Efficiency through Contamination Simulations at Various Taxonomic Ranks
Source: MDPI journal article supplement (doi:10.3390/applmicrobiol4010009), 2024-01-10
Supplement: s1 [file s1]

# Supplemental file 1

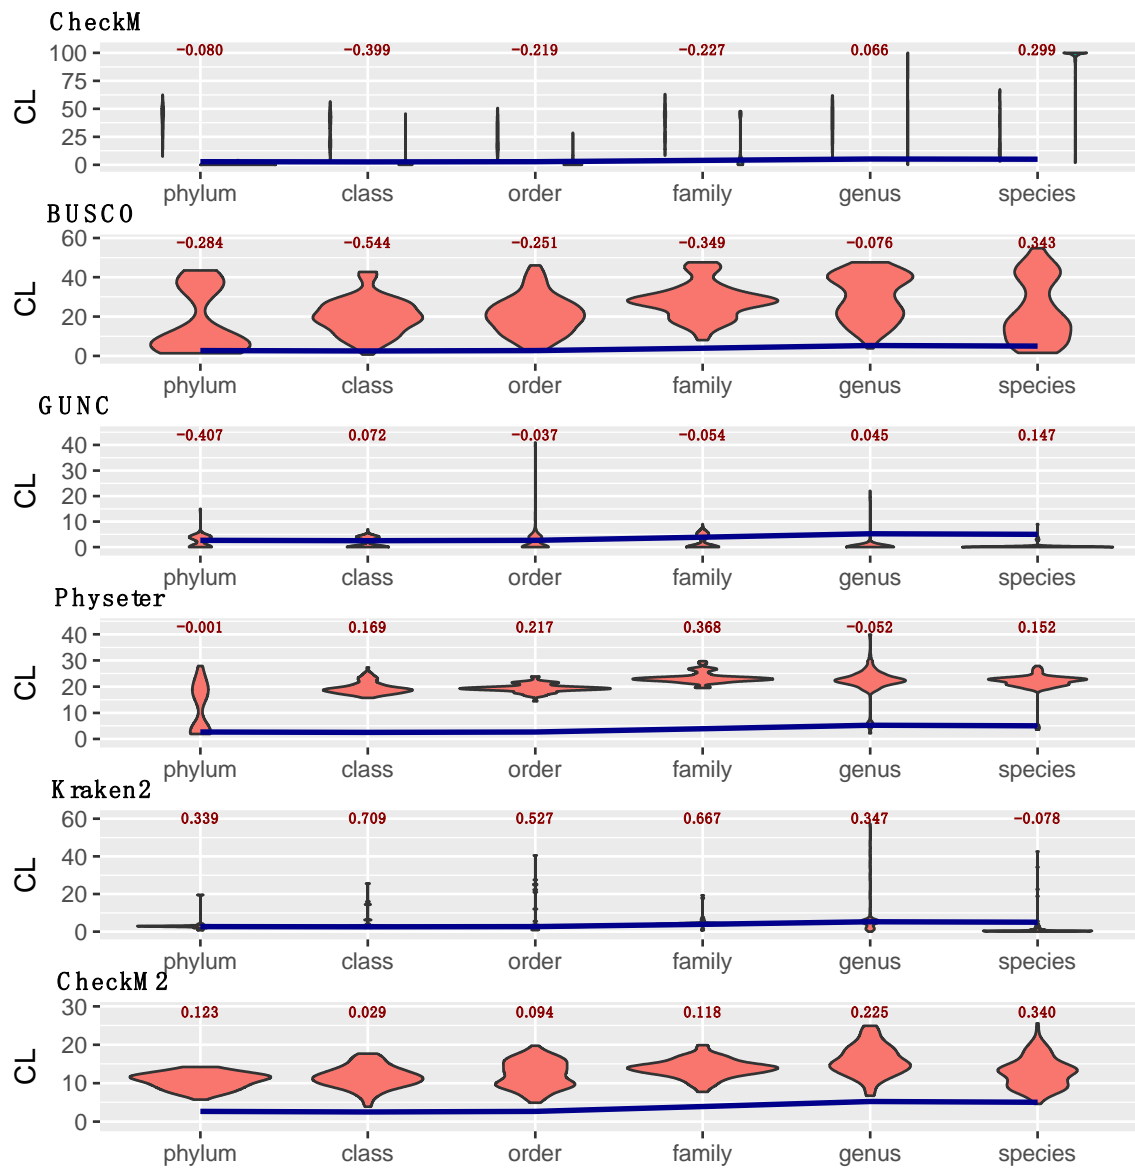

**Figure S1: Contamination estimation, at six taxonomic ranks of the redundant type of contamination.**

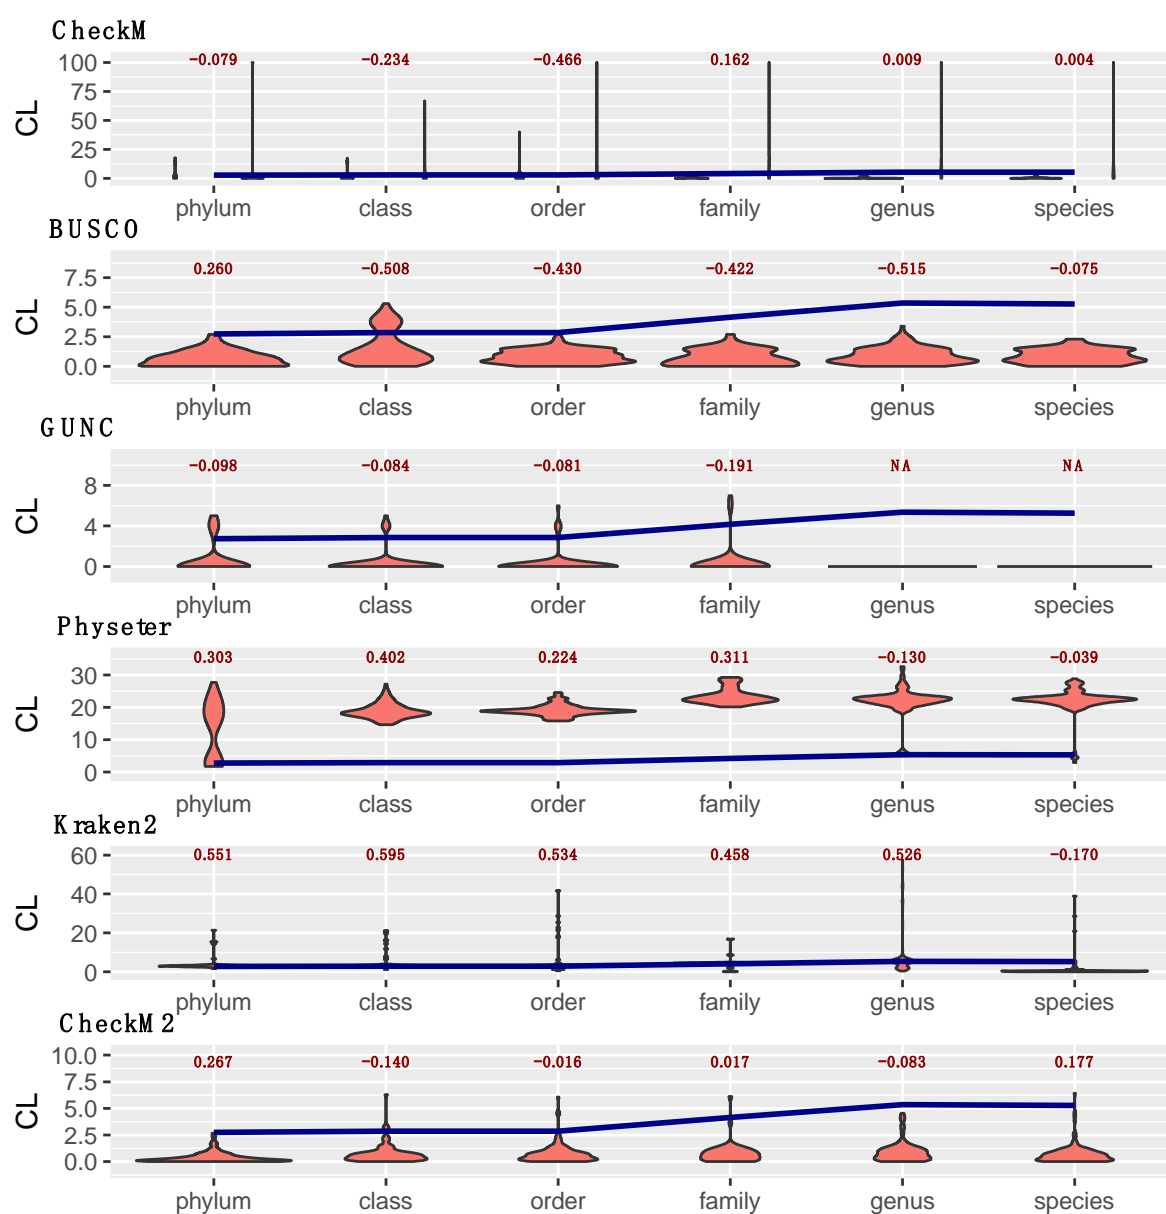

**Figure S2: Contamination estimation, at six taxonomic ranks of the replaced type of contamination.**

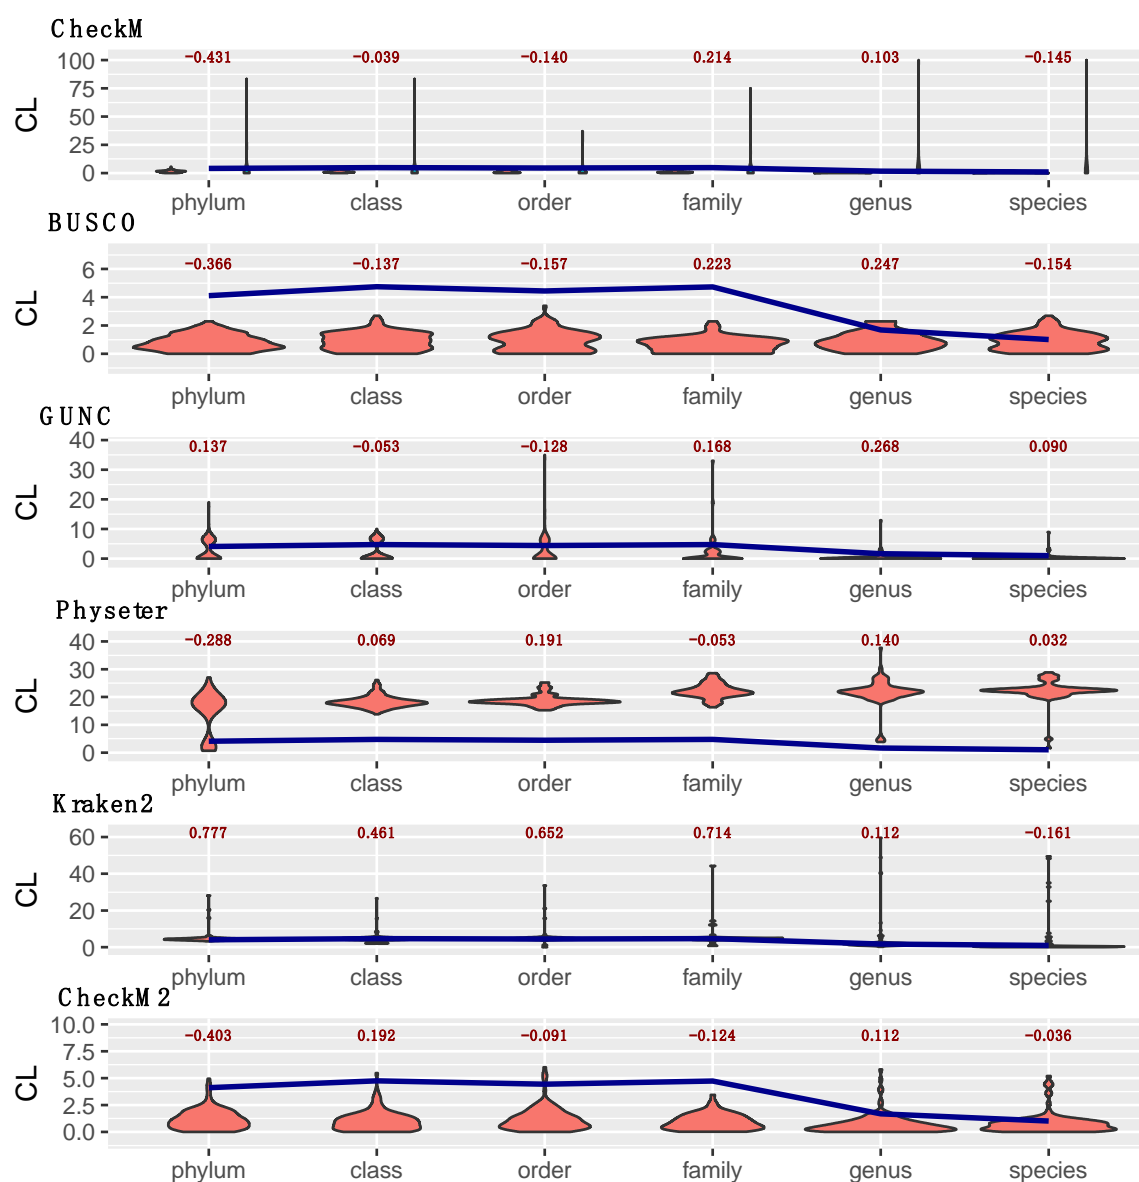

**Figure S3: Contamination estimation, at six taxonomic ranks of the single type of contamination.**

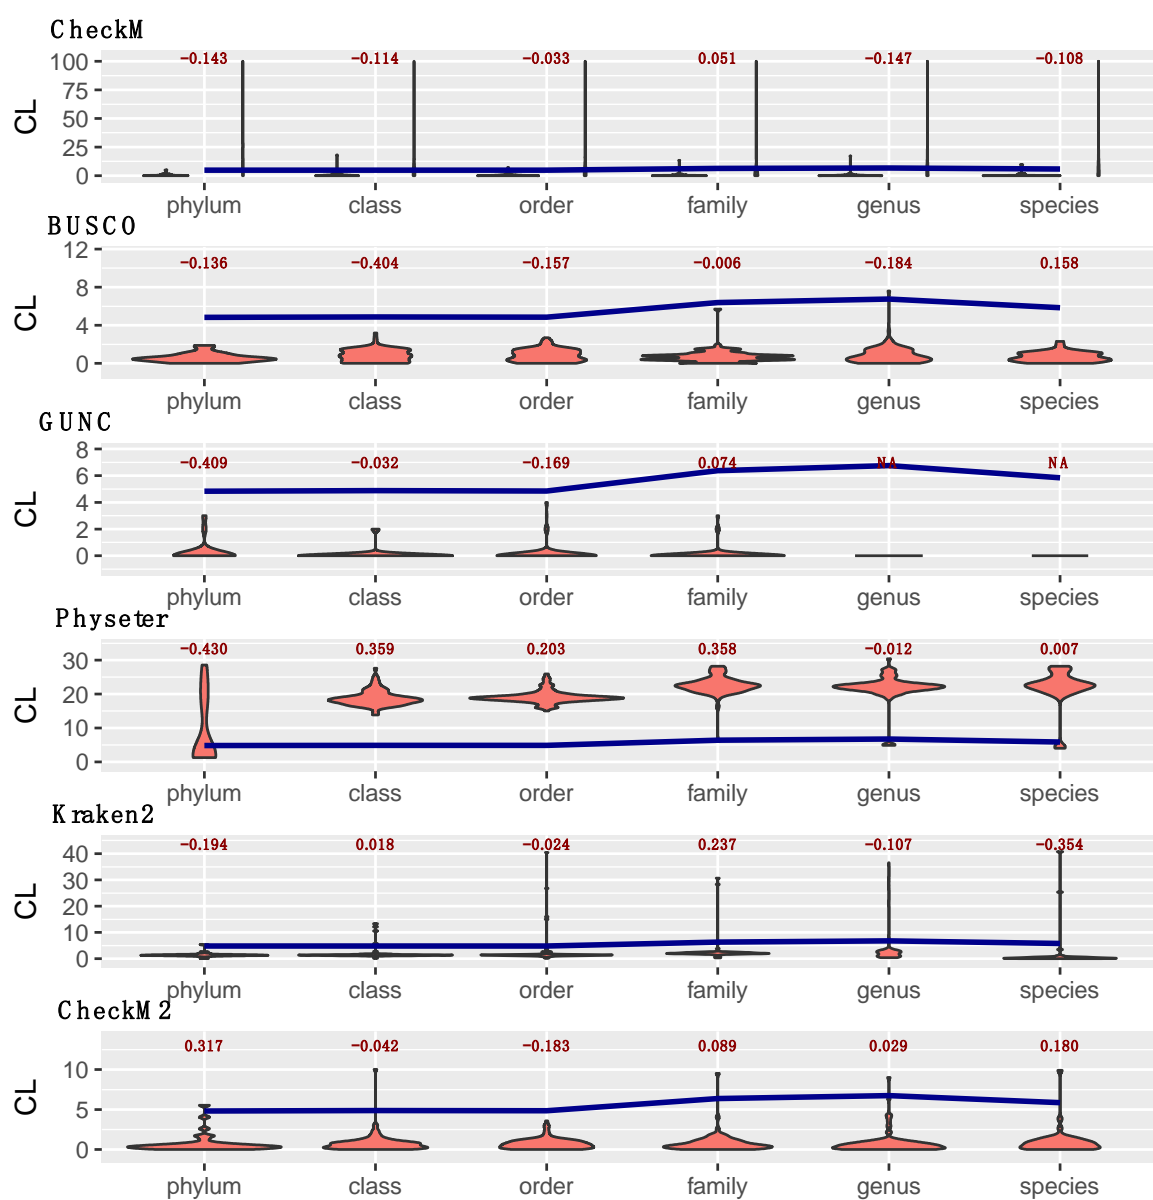

**Figure S4: Contamination estimation, at six taxonomic ranks and with a mutation rate of 10%, of the combined types of contamination.**

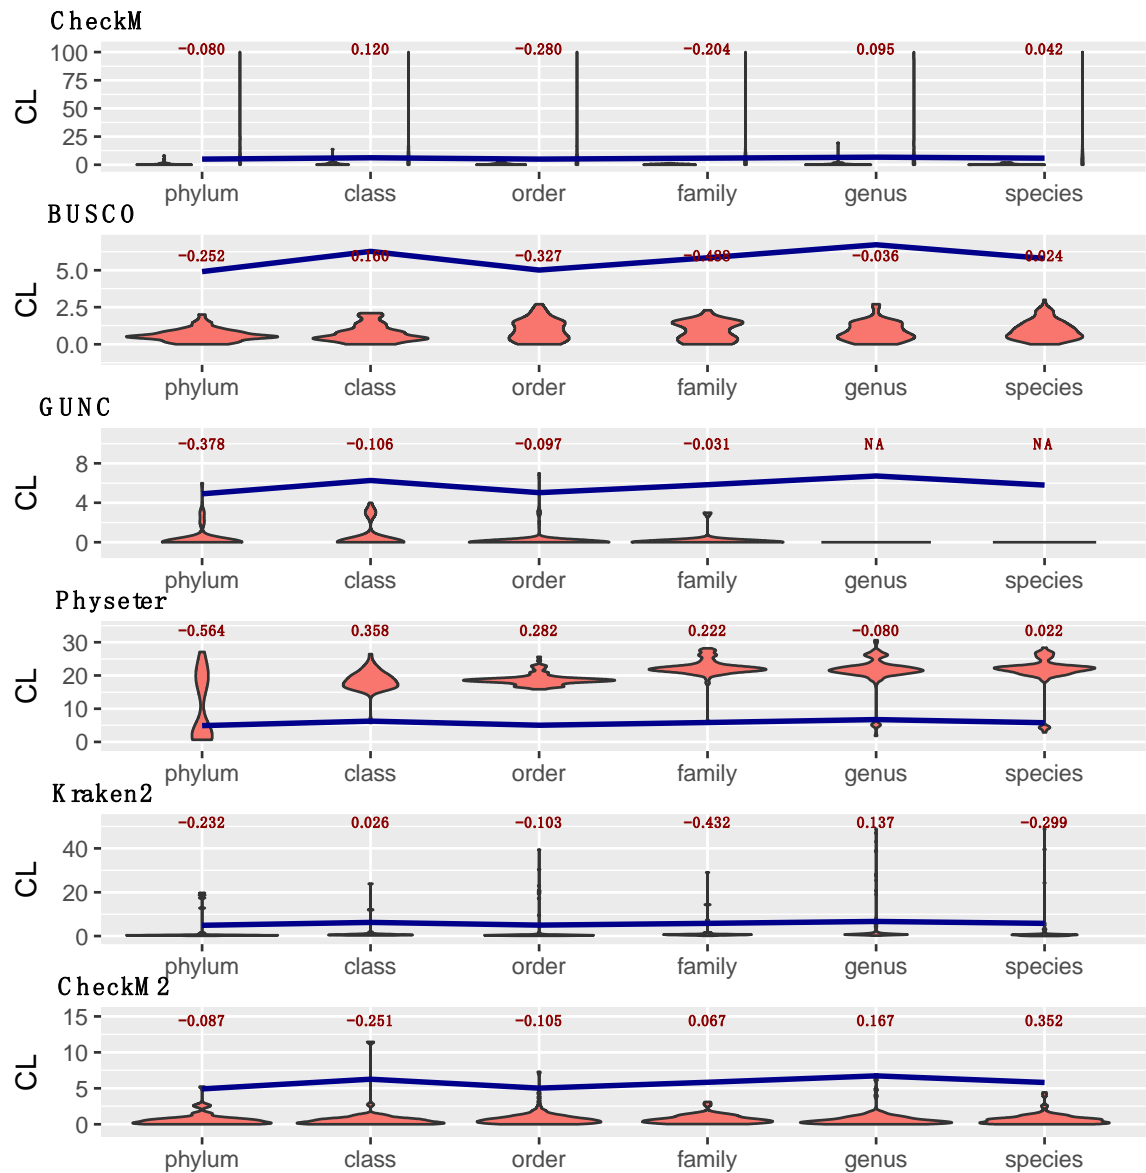

**Figure S5: Contamination estimation, at six taxonomic ranks and with a mutation rate of 25%, of the combined types of contamination.**

| Genome          | Checkm | Busco | GUNC | Physeter | Kraken | Checkm2 |
|-----------------|--------|-------|------|----------|--------|---------|
| GCF_902388275.1 | 0.00   | 1.1   | 0.0  | 24.76    | 0.14   | 10.09   |
| GCF_902386435.1 | 0.00   | 0.4   | 0.0  | 22.63    | 0.51   | 10.13   |
| GCF_901523095.1 | 0.00   | 0.4   | 0.0  | 22.98    | 0.35   | 0.06    |
| GCF_901482515.1 | 0.00   | 0.4   | 0.0  | 22.95    | 0.25   | 0.04    |
| GCF_900478015.1 | 0.00   | 0.8   | 0.0  | 22.73    | 0.44   | 0.07    |
| GCF_900461415.1 | 0.00   | 0.4   | 0.0  | 23.21    | 0.34   | 0.53    |
| GCF_900461395.1 | 0.00   | 0.4   | 0.0  | 22.88    | 0.98   | 0.29    |
| GCF_900461135.1 | 0.00   | 0.4   | 0.0  | 22.59    | 0.51   | 0.34    |
| GCF_900447135.1 | 0.00   | 0.8   | 0.0  | 22.12    | 0.54   | 10.13   |
| GCF_900447095.1 | 0.00   | 0.4   | 0.0  | 23.10    | 0.34   | 10.13   |
| GCF_900447085.1 | 0.00   | 0.8   | 0.0  | 23.15    | 1.15   | 0.1     |
| GCF_900447035.1 | 0.00   | 0.4   | 0.0  | 23.49    | 0.41   | 0.43    |
| GCF_900209925.1 | 1.34   | 0.0   | 0.0  | 22.27    | 0.18   | 10.61   |
| GCF_900184165.1 | 0.24   | 0.0   | 0.0  | 21.42    | 0.98   | 0.04    |
| GCF_021561035.1 | 0.70   | 1.5   | 0.0  | 22.37    | 12.68  | 0.29    |
| GCF_021560735.1 | 0.00   | 0.8   | 0.0  | 21.97    | 0.46   | 0.14    |
| GCF_020809405.1 | 0.00   | 1.5   | 0.0  | 22.28    | 0.13   | 6.01    |
| GCF_020139295.1 | 0.00   | 0.4   | 0.0  | 22.69    | 0.35   | 0.4     |

|                     |      |     |     |       |      |       |
|---------------------|------|-----|-----|-------|------|-------|
| GCF_020139<br>255.1 | 0.00 | 0.8 | 0.0 | 21.31 | 0.26 | 0.25  |
| GCF_020139<br>235.1 | 0.00 | 0.8 | 0.0 | 22.16 | 0.44 | 0.07  |
| GCF_020139<br>215.1 | 0.00 | 0.8 | 0.0 | 22.45 | 0.45 | 10.13 |
| GCF_020138<br>795.1 | 0.00 | 0.8 | 0.0 | 22.36 | 0.40 | 0.09  |
| GCF_020138<br>775.1 | 0.00 | 0.8 | 0.0 | 23.14 | 0.30 | 0.14  |
| GCF_020138<br>755.1 | 0.00 | 0.4 | 0.0 | 23.28 | 0.31 | 0.37  |
| GCF_020138<br>735.1 | 0.00 | 0.4 | 0.0 | 21.64 | 0.39 | 0.68  |
| GCF_020138<br>715.1 | 0.00 | 0.4 | 0.0 | 22.04 | 0.38 | 0.17  |
| GCF_020138<br>695.1 | 0.00 | 0.4 | 0.0 | 22.36 | 0.25 | 10.13 |
| GCF_020138<br>675.1 | 0.00 | 0.4 | 0.0 | 23.23 | 0.30 | 0.39  |
| GCF_020138<br>655.1 | 0.00 | 0.8 | 0.0 | 22.31 | 0.29 | 0.67  |
| GCF_020138<br>635.1 | 0.00 | 0.4 | 0.0 | 22.54 | 0.27 | 0.47  |
| GCF_020138<br>595.1 | 0.00 | 0.4 | 0.0 | 22.24 | 0.46 | 0.07  |
| GCF_020138<br>575.1 | 0.00 | 0.4 | 0.0 | 22.62 | 0.23 | 0.08  |
| GCF_020138<br>555.1 | 0.00 | 0.4 | 0.0 | 23.04 | 0.27 | 0.09  |
| GCF_020138<br>535.1 | 0.00 | 0.4 | 0.0 | 22.67 | 0.38 | 0.3   |
| GCF_020138<br>515.1 | 0.00 | 0.4 | 0.0 | 21.93 | 0.41 | 0.45  |
| GCF_020138<br>475.1 | 0.00 | 0.4 | 0.0 | 21.96 | 0.41 | 10.13 |
| GCF_020138<br>455.1 | 0.00 | 0.4 | 0.0 | 21.95 | 0.49 | 0.06  |

|                     |      |     |     |       |      |       |
|---------------------|------|-----|-----|-------|------|-------|
| GCF_020138<br>375.1 | 0.00 | 0.4 | 0.0 | 21.57 | 0.36 | 0.31  |
| GCF_020138<br>355.1 | 0.00 | 0.4 | 0.0 | 22.33 | 0.46 | 0.06  |
| GCF_020138<br>335.1 | 0.00 | 0.4 | 0.0 | 22.33 | 0.31 | 0.13  |
| GCF_019977<br>655.1 | 0.00 | 1.9 | 0.0 | 18.81 | 0.06 | 1.31  |
| GCF_019969<br>455.1 | 0.00 | 0.8 | 0.0 | 22.35 | 3.36 | 12.06 |
| GCF_019969<br>425.1 | 0.00 | 0.8 | 0.0 | 23.65 | 0.05 | 0.94  |
| GCF_019969<br>405.1 | 0.34 | 1.1 | 0.0 | 23.10 | 3.27 | 1.33  |
| GCF_019969<br>385.1 | 0.00 | 0.0 | 0.0 | 24.53 | 1.20 | 0.11  |
| GCF_019968<br>075.1 | 0.00 | 0.0 | 0.0 | 25.84 | 0.05 | 0.13  |
| GCF_019968<br>055.1 | 0.00 | 0.0 | 0.0 | 26.11 | 0.04 | 0.23  |
| GCF_019968<br>035.1 | 0.00 | 0.8 | 0.0 | 23.71 | 0.05 | 9.98  |
| GCF_019968<br>015.1 | 0.00 | 0.8 | 0.0 | 23.87 | 0.04 | 0.93  |
| GCF_019967<br>995.1 | 0.00 | 0.8 | 0.0 | 23.37 | 0.04 | 0.9   |
| GCF_019967<br>975.1 | 0.00 | 0.8 | 0.0 | 23.26 | 0.08 | 1.01  |
| GCF_019967<br>955.1 | 0.00 | 1.1 | 0.0 | 24.89 | 0.13 | 1.36  |
| GCF_018223<br>625.1 | 0.13 | 0.0 | 0.0 | 23.56 | 0.07 | 2.92  |
| GCF_017897<br>335.1 | 0.00 | 0.4 | 0.0 | 23.26 | 0.35 | 0.37  |
| GCF_017352<br>215.1 | 0.70 | 0.4 | 0.0 | 28.34 | 0.00 | 0.04  |
| GCF_017347<br>585.1 | 0.24 | 0.2 | 0.0 | 24.15 | 0.36 | 0.04  |



|                     |      |     |     |       |       |       |
|---------------------|------|-----|-----|-------|-------|-------|
| GCF_017100<br>085.1 | 0.69 | 0.4 | 0.0 | 22.66 | 0.27  | 10.54 |
| GCF_016694<br>795.1 | 0.00 | 1.1 | 0.0 | 24.16 | 0.21  | 0.67  |
| GCF_016027<br>155.1 | 0.00 | 0.8 | 0.0 | 22.30 | 0.50  | 0.05  |
| GCF_016026<br>675.1 | 0.00 | 0.4 | 0.0 | 22.18 | 0.40  | 10.13 |
| GCF_013149<br>375.1 | 0.00 | 1.1 | 0.0 | 20.76 | 0.05  | 11.19 |
| GCF_011065<br>855.2 | 0.20 | 0.8 | 0.0 | 20.64 | 4.96  | 1.89  |
| GCF_010509<br>575.1 | 0.00 | 0.0 | 0.0 | 23.58 | 0.19  | 10.09 |
| GCF_008151<br>785.1 | 0.00 | 1.1 | 0.0 | 22.99 | 0.25  | 9.42  |
| GCF_006351<br>925.1 | 0.96 | 1.5 | 0.0 | 23.44 | 0.02  | 10.91 |
| GCF_003403<br>315.2 | 0.00 | 0.0 | 0.0 | 22.20 | 0.11  | 11.63 |
| GCF_003350<br>945.1 | 0.00 | 0.4 | 0.0 | 23.01 | 0.37  | 10.13 |
| GCF_003312<br>465.1 | 0.00 | 1.1 | 0.0 | 24.61 | 0.06  | 9.98  |
| GCF_003293<br>635.1 | 0.00 | 1.1 | 0.0 | 24.76 | 0.14  | 10.09 |
| GCF_003203<br>455.1 | 0.00 | 0.8 | 0.0 | 20.88 | 0.66  | 10.61 |
| GCF_002865<br>995.1 | 1.63 | 1.1 | 0.0 | 22.69 | 0.17  | 10.63 |
| GCF_002844<br>395.1 | 0.67 | 0.8 | 0.0 | 18.99 | 0.22  | 10.7  |
| GCF_002796<br>935.1 | 1.03 | 1.1 | 0.0 | 20.57 | 39.39 | 13.86 |
| GCF_002734<br>145.1 | 0.00 | 0.0 | 0.0 | 23.91 | 0.17  | 10.09 |
| GCF_002586<br>945.1 | 0.00 | 1.1 | 0.0 | 25.02 | 0.03  | 9.98  |

|                     |      |     |     |       |       |       |
|---------------------|------|-----|-----|-------|-------|-------|
| GCF_002564<br>225.1 | 0.00 | 0.0 | 0.0 | 21.73 | 1.11  | 10.56 |
| GCF_002355<br>795.1 | 0.00 | 0.8 | 0.0 | 23.37 | 0.30  | 10.13 |
| GCF_001950<br>115.1 | 0.93 | 0.8 | 0.0 | 22.89 | 1.51  | 10.63 |
| GCF_001889<br>325.1 | 0.69 | 1.1 | 0.0 | 21.57 | 7.65  | 11.19 |
| GCF_001856<br>695.1 | 0.08 | 1.1 | 0.0 | 23.09 | 0.11  | 11.19 |
| GCF_001856<br>645.1 | 0.08 | 1.1 | 0.0 | 23.07 | 0.14  | 11.19 |
| GCF_001854<br>085.1 | 0.00 | 0.4 | 0.0 | 22.63 | 0.51  | 10.13 |
| GCF_001735<br>765.2 | 0.00 | 0.4 | 0.0 | 21.41 | 0.37  | 10.59 |
| GCF_001705<br>235.1 | 1.03 | 1.1 | 0.0 | 20.57 | 39.39 | 13.86 |
| GCF_000828<br>305.1 | 0.16 | 0.4 | 0.0 | 22.49 | 3.44  | 10.89 |
| GCF_000807<br>255.1 | 0.08 | 1.1 | 0.0 | 23.06 | 0.15  | 11.19 |
| GCF_000807<br>175.1 | 0.08 | 1.1 | 0.0 | 23.23 | 0.15  | 11.19 |
| GCF_000789<br>355.1 | 0.00 | 0.4 | 0.0 | 20.92 | 0.15  | 10.89 |
| GCF_000703<br>125.1 | 0.69 | 0.4 | 0.0 | 25.13 | 38.94 | 10.13 |
| GCF_000526<br>495.1 | 0.34 | 0.4 | 0.0 | 20.02 | 20.63 | 13.67 |
| GCF_000389<br>635.1 | 0.39 | 3.0 | 0.0 | 21.05 | 0.02  | 13.71 |
| GCF_000307<br>125.1 | 0.00 | 0.0 | 0.0 | 21.66 | 0.11  | 10.89 |
| GCF_000284<br>435.1 | 0.00 | 0.8 | 0.0 | 21.61 | 40.35 | 4.79  |
| GCF_000283<br>555.1 | 0.99 | 0.4 | 0.0 | 21.58 | 0.10  | 4.73  |

|                     |      |     |     |       |       |       |
|---------------------|------|-----|-----|-------|-------|-------|
| GCF_000270<br>205.1 | 0.00 | 0.8 | 0.0 | 21.59 | 40.51 | 6.8   |
| GCF_000247<br>605.1 | 1.06 | 0.8 | 0.0 | 22.95 | 0.01  | 11.82 |
| GCF_000244<br>875.1 | 1.35 | 1.1 | 0.0 | 19.74 | 0.01  | 15.79 |
| GCF_000237<br>085.1 | 0.00 | 0.4 | 0.0 | 18.76 | 0.03  | 15.83 |
| GCF_000218<br>855.1 | 0.00 | 1.1 | 0.0 | 20.95 | 0.07  | 11.19 |
| GCF_000191<br>905.1 | 0.00 | 1.1 | 0.0 | 21.07 | 0.06  | 11.19 |
| GCF_000190<br>635.1 | 0.34 | 0.0 | 0.0 | 24.12 | 0.02  | 10.59 |
| GCF_000184<br>705.1 | 0.00 | 0.0 | 0.0 | 21.68 | 0.12  | 11.25 |
| GCF_000166<br>695.1 | 0.00 | 0.0 | 0.0 | 23.29 | 1.97  | 10.13 |
| GCF_000165<br>465.1 | 0.87 | 0.8 | 0.0 | 29.02 | 0.12  | 9.3   |
| GCF_000022<br>325.1 | 0.00 | 0.0 | 0.0 | 21.66 | 1.02  | 10.56 |
| GCF_000020<br>165.1 | 0.00 | 0.4 | 0.0 | 21.26 | 0.12  | 10.89 |
| GCF_000019<br>165.1 | 0.89 | 0.5 | 0.0 | 25.72 | 0.01  | 9.97  |
| GCF_000016<br>165.1 | 1.27 | 1.5 | 0.0 | 25.90 | 0.00  | 10.59 |
| GCF_000014<br>125.1 | 0.00 | 0.4 | 0.0 | 26.64 | 0.19  | 9.55  |
| GCF_000013<br>845.2 | 0.00 | 0.4 | 0.0 | 23.20 | 0.26  | 9.76  |
| GCF_000012<br>865.1 | 0.00 | 0.6 | 0.0 | 29.44 | 0.00  | 10.31 |
| GCF_000009<br>685.1 | 0.00 | 0.4 | 0.0 | 23.25 | 0.35  | 10.13 |
| GCF_000008<br>765.1 | 0.00 | 1.1 | 0.0 | 21.07 | 0.05  | 11.19 |

|                     |      |     |      |       |      |       |
|---------------------|------|-----|------|-------|------|-------|
| GCF_000512<br>895.1 | 0.47 | 0.4 | 0.0  | 24.70 | 0.07 | 10.47 |
| GCF_000305<br>815.1 | 0.00 | 0.8 | 0.0  | 24.30 | 6.19 | 10.52 |
| GCF_000305<br>775.1 | 0.00 | 0.8 | 0.0  | 23.79 | 7.12 | 10.52 |
| GCF_002005<br>145.1 | 0.84 | 1.1 | 0.0  | 28.12 | 0.05 | 10.03 |
| GCF_900184<br>125.1 | 0.00 | 0.0 | 0.0  | 21.47 | 1.12 | 0.03  |
| GCF_900166<br>995.1 | 0.00 | 0.0 | 0.0  | 21.35 | 1.03 | 0.02  |
| GCF_002564<br>135.1 | 0.00 | 0.0 | 0.0  | 21.47 | 1.08 | 10.56 |
| GCF_002300<br>505.1 | 0.00 | 0.2 | 0.0  | 21.90 | 1.02 | 10.56 |
| GCF_002300<br>425.1 | 0.00 | 0.0 | 0.0  | 21.78 | 1.12 | 10.56 |
| GCF_002300<br>395.1 | 0.00 | 0.0 | 0.0  | 21.50 | 1.11 | 10.56 |
| GCF_002300<br>375.1 | 0.00 | 0.0 | 0.0  | 21.47 | 1.05 | 10.56 |
| GCF_002300<br>335.1 | 0.00 | 0.0 | 0.0  | 21.80 | 1.02 | 10.56 |
| GCF_002564<br>185.1 | 0.00 | 0.0 | 0.0  | 22.22 | 1.01 | 10.56 |
| GCF_003047<br>205.1 | 1.19 | 1.8 | 0.0  | 28.73 | 0.00 | 10.22 |
| GCF_006380<br>995.1 | 0.55 | 1.5 | 0.0  | 22.10 | 0.93 | 11.19 |
| GCF_018884<br>745.1 | 0.38 | 1.5 | 0.0  | 22.05 | 0.48 | 0.54  |
| GCF_006381<br>115.1 | 1.06 | 2.7 | 0.0  | 22.21 | 0.48 | 11.19 |
| GCF_002082<br>985.1 | 0.45 | 1.5 | 0.02 | 21.51 | 0.88 | 11.19 |
| GCF_900184<br>185.1 | 0.00 | 0.0 | 0.0  | 21.71 | 1.02 | 0.02  |

|                     |      |     |     |       |       |       |
|---------------------|------|-----|-----|-------|-------|-------|
| GCF_900184<br>135.1 | 0.00 | 0.0 | 0.0 | 21.63 | 1.00  | 0.02  |
| GCF_900168<br>285.1 | 0.48 | 0.0 | 0.0 | 21.29 | 1.05  | 0.02  |
| GCF_900168<br>145.1 | 1.01 | 0.6 | 0.0 | 21.54 | 1.06  | 0.92  |
| GCF_900168<br>085.1 | 0.24 | 0.0 | 0.0 | 21.75 | 1.08  | 0.02  |
| GCF_009905<br>255.1 | 0.00 | 0.4 | 0.0 | 28.73 | 4.85  | 0.0   |
| GCF_000955<br>725.1 | 0.00 | 0.0 | 0.0 | 22.63 | 62.21 | 10.51 |
| GCF_000806<br>225.2 | 1.00 | 0.8 | 0.0 | 29.94 | 60.63 | 9.93  |
| GCF_000307<br>585.2 | 0.00 | 0.4 | 0.0 | 27.37 | 6.91  | 10.13 |
| GCF_000189<br>775.2 | 0.96 | 0.8 | 0.0 | 29.22 | 0.07  | 9.65  |
| GCF_000175<br>295.2 | 0.24 | 0.4 | 0.0 | 31.79 | 5.69  | 9.83  |
| GCF_000166<br>775.1 | 0.00 | 0.0 | 0.0 | 22.70 | 0.91  | 10.56 |
| GCF_000166<br>355.1 | 0.00 | 0.0 | 0.0 | 23.93 | 0.46  | 10.13 |
| GCF_000166<br>335.1 | 0.00 | 0.0 | 0.0 | 24.64 | 0.33  | 10.3  |
| GCF_000147<br>695.2 | 0.00 | 0.6 | 0.0 | 29.52 | 1.54  | 9.93  |
| GCF_000145<br>215.1 | 0.00 | 0.0 | 0.0 | 24.59 | 0.38  | 10.45 |
| GCF_000025<br>645.1 | 0.00 | 0.0 | 0.0 | 30.71 | 1.55  | 9.95  |
| GCF_000019<br>085.1 | 0.24 | 0.4 | 0.0 | 31.85 | 6.16  | 9.85  |
| GCF_000019<br>065.1 | 0.00 | 0.6 | 0.0 | 32.72 | 45.11 | 9.94  |
| GCF_902386<br>365.1 | 0.37 | 1.1 | 0.0 | 22.83 | 0.47  | 0.85  |

|                     |      |     |      |       |      |       |
|---------------------|------|-----|------|-------|------|-------|
| GCF_900446<br>965.1 | 0.37 | 1.5 | 0.02 | 22.12 | 0.52 | 0.4   |
| GCF_021378<br>415.1 | 0.37 | 1.5 | 0.0  | 22.38 | 0.31 | 11.19 |
| GCF_019095<br>765.1 | 0.45 | 1.5 | 0.0  | 22.50 | 0.38 | 0.76  |
| GCF_018885<br>105.1 | 0.37 | 1.5 | 0.0  | 22.31 | 0.39 | 0.26  |
| GCF_018884<br>965.1 | 0.53 | 1.5 | 0.0  | 23.38 | 0.42 | 0.54  |
| GCF_018884<br>885.1 | 0.32 | 1.5 | 0.0  | 22.18 | 0.43 | 0.25  |
| GCF_018884<br>765.1 | 0.37 | 1.5 | 0.02 | 22.31 | 0.59 | 0.46  |
| GCF_018255<br>775.1 | 0.37 | 1.5 | 0.0  | 23.09 | 0.36 | 0.84  |
| GCF_015732<br>555.1 | 0.37 | 1.5 | 0.0  | 22.76 | 0.43 | 1.18  |
| GCF_015238<br>635.1 | 0.44 | 1.5 | 0.0  | 21.71 | 0.47 | 0.66  |
| GCF_014236<br>775.1 | 0.37 | 1.5 | 0.0  | 22.52 | 0.53 | 11.19 |
| GCF_009867<br>095.1 | 0.70 | 1.5 | 0.0  | 22.20 | 0.39 | 0.52  |
| GCF_009730<br>495.1 | 0.37 | 1.5 | 0.0  | 22.73 | 0.44 | 11.19 |
| GCF_008245<br>165.1 | 0.37 | 1.5 | 0.0  | 22.25 | 0.29 | 11.19 |
| GCF_006408<br>335.1 | 0.62 | 2.3 | 0.0  | 23.86 | 1.27 | 11.19 |
| GCF_006408<br>325.1 | 0.40 | 1.5 | 0.0  | 22.90 | 0.38 | 11.19 |
| GCF_006381<br>095.1 | 0.37 | 1.5 | 0.0  | 22.82 | 0.46 | 11.19 |
| GCF_006381<br>025.1 | 0.57 | 1.9 | 0.0  | 22.77 | 0.40 | 11.19 |
| GCF_006379<br>355.1 | 0.37 | 1.5 | 0.0  | 22.55 | 0.45 | 11.19 |

|                     |      |     |     |       |      |       |
|---------------------|------|-----|-----|-------|------|-------|
| GCF_003482<br>345.1 | 0.37 | 1.5 | 0.0 | 23.50 | 0.32 | 11.19 |
| GCF_003482<br>325.1 | 0.37 | 1.5 | 0.0 | 22.41 | 0.27 | 11.19 |
| GCF_003482<br>255.1 | 0.45 | 1.5 | 0.0 | 22.02 | 0.48 | 11.19 |
| GCF_003482<br>035.1 | 0.37 | 1.5 | 0.0 | 22.51 | 0.35 | 11.19 |
| GCF_003481<br>965.1 | 0.32 | 1.1 | 0.0 | 22.35 | 0.47 | 11.19 |
| GCF_003481<br>905.1 | 0.37 | 1.5 | 0.0 | 21.92 | 0.56 | 11.19 |
| GCF_003313<br>585.1 | 0.37 | 1.5 | 0.0 | 23.01 | 0.40 | 11.19 |
| GCF_003313<br>565.1 | 0.37 | 1.5 | 0.0 | 23.21 | 0.47 | 11.19 |
| GCF_003313<br>545.1 | 0.37 | 1.5 | 0.0 | 22.79 | 0.37 | 11.19 |
| GCF_002946<br>195.1 | 0.37 | 1.5 | 0.0 | 22.22 | 0.30 | 11.19 |
| GCF_002946<br>135.1 | 0.37 | 1.5 | 0.0 | 22.41 | 0.38 | 11.19 |
| GCF_002945<br>945.1 | 0.37 | 1.5 | 0.0 | 22.29 | 0.35 | 11.19 |
| GCF_002945<br>755.1 | 0.37 | 1.5 | 0.0 | 22.91 | 0.38 | 11.19 |
| GCF_002945<br>665.1 | 0.37 | 1.5 | 0.0 | 22.68 | 0.29 | 11.19 |
| GCF_002945<br>515.1 | 0.37 | 1.5 | 0.0 | 22.86 | 0.43 | 11.19 |
| GCF_002945<br>415.1 | 0.37 | 1.5 | 0.0 | 22.33 | 0.38 | 11.19 |
| GCF_002812<br>585.1 | 0.37 | 1.1 | 0.0 | 22.83 | 0.47 | 11.19 |
| GCF_002080<br>065.1 | 0.37 | 1.5 | 0.0 | 23.35 | 0.47 | 11.19 |
| GCF_001972<br>015.1 | 0.37 | 1.5 | 0.0 | 22.63 | 0.42 | 11.19 |

|                     |      |     |      |       |      |       |
|---------------------|------|-----|------|-------|------|-------|
| GCF_000953<br>275.1 | 0.37 | 1.5 | 0.0  | 23.45 | 0.45 | 11.19 |
| GCF_000932<br>055.2 | 0.37 | 1.5 | 0.0  | 23.08 | 0.49 | 11.19 |
| GCF_000826<br>625.1 | 0.37 | 1.5 | 0.0  | 22.50 | 0.45 | 11.19 |
| GCF_000085<br>225.1 | 0.37 | 1.5 | 0.0  | 22.62 | 0.30 | 11.19 |
| GCF_000009<br>205.2 | 0.37 | 1.5 | 0.0  | 23.28 | 0.44 | 11.19 |
| GCF_003999<br>255.1 | 0.16 | 0.2 | 0.0  | 23.43 | 0.50 | 10.56 |
| GCF_000016<br>545.1 | 0.00 | 0.0 | 0.0  | 23.61 | 0.66 | 10.56 |
| GCF_003490<br>105.1 | 0.71 | 1.5 | 0.0  | 21.79 | 0.36 | 11.19 |
| GCF_003482<br>065.1 | 0.91 | 1.5 | 0.0  | 23.24 | 0.43 | 11.19 |
| GCF_001972<br>105.1 | 0.38 | 1.5 | 0.0  | 21.91 | 0.79 | 11.19 |
| GCF_000092<br>945.1 | 1.28 | 1.1 | 0.0  | 26.19 | 0.01 | 10.16 |
| GCF_014170<br>115.1 | 0.23 | 0.4 | 0.0  | 27.57 | 0.06 | 0.16  |
| GCF_001679<br>705.1 | 0.23 | 0.4 | 0.0  | 27.39 | 0.04 | 10.54 |
| GCF_001642<br>655.1 | 0.23 | 0.4 | 0.0  | 26.94 | 0.04 | 10.54 |
| GCF_006408<br>435.1 | 0.64 | 1.5 | 0.0  | 22.65 | 0.44 | 11.19 |
| GCF_003482<br>225.1 | 0.84 | 1.5 | 0.0  | 21.82 | 0.41 | 11.19 |
| GCF_018885<br>065.1 | 0.38 | 1.5 | 0.0  | 22.13 | 0.54 | 11.19 |
| GCF_018885<br>085.1 | 0.53 | 1.5 | 0.0  | 21.78 | 0.37 | 0.21  |
| GCF_006408<br>375.1 | 0.53 | 1.5 | 0.02 | 21.84 | 0.38 | 11.19 |



|                     |      |     |     |       |       |       |
|---------------------|------|-----|-----|-------|-------|-------|
| GCF_002812<br>645.1 | 0.55 | 1.1 | 0.0 | 22.41 | 0.31  | 11.19 |
| GCF_013487<br>845.1 | 0.00 | 0.5 | 0.0 | 16.86 | 0.02  | 9.09  |
| GCF_018884<br>825.1 | 0.55 | 1.5 | 0.0 | 22.65 | 0.24  | 0.16  |
| GCF_006408<br>285.1 | 0.55 | 1.5 | 0.0 | 22.62 | 1.72  | 11.19 |
| GCF_002812<br>605.1 | 0.55 | 1.1 | 0.0 | 22.85 | 0.35  | 11.19 |
| GCF_002007<br>885.1 | 0.55 | 1.5 | 0.0 | 22.40 | 0.33  | 11.19 |
| GCF_001971<br>945.1 | 0.55 | 1.5 | 0.0 | 22.51 | 0.32  | 11.19 |
| GCF_002945<br>855.1 | 0.37 | 1.5 | 0.0 | 22.43 | 0.36  | 11.19 |
| GCF_902387<br>955.1 | 0.24 | 0.0 | 0.0 | 23.38 | 0.20  | 12.21 |
| GCF_000225<br>345.1 | 0.24 | 0.0 | 0.0 | 23.38 | 0.20  | 12.21 |
| GCF_009796<br>305.1 | 0.00 | 0.4 | 0.0 | 24.39 | 0.03  | 10.52 |
| GCF_900604<br>355.1 | 0.23 | 0.0 | 0.0 | 23.70 | 21.01 | 4.29  |
| GCF_020181<br>455.1 | 0.39 | 0.4 | 0.0 | 23.88 | 0.49  | 0.97  |
| GCF_016904<br>155.1 | 0.00 | 0.4 | 0.0 | 25.61 | 0.30  | 10.66 |
| GCF_016904<br>015.1 | 0.00 | 0.0 | 0.0 | 27.02 | 0.38  | 10.61 |
| GCF_016889<br>005.1 | 0.00 | 0.0 | 0.0 | 25.26 | 0.04  | 1.41  |
| GCF_009831<br>375.1 | 0.00 | 0.0 | 0.0 | 25.27 | 0.37  | 10.66 |
| GCF_009684<br>695.1 | 0.58 | 0.0 | 0.0 | 23.57 | 0.08  | 12.21 |
| GCF_004295<br>125.1 | 1.17 | 1.1 | 0.0 | 25.27 | 0.04  | 12.21 |

|                     |      |     |     |       |       |       |
|---------------------|------|-----|-----|-------|-------|-------|
| GCF_002234<br>355.1 | 0.55 | 1.5 | 0.0 | 22.49 | 0.32  | 11.19 |
| GCF_011058<br>795.1 | 0.44 | 0.0 | 0.0 | 26.43 | 0.13  | 3.19  |
| GCF_011058<br>775.1 | 0.44 | 0.0 | 0.0 | 26.83 | 0.06  | 3.19  |
| GCF_011058<br>755.1 | 0.44 | 0.2 | 0.0 | 25.13 | 0.32  | 0.1   |
| GCF_011058<br>735.1 | 0.44 | 0.2 | 0.0 | 25.84 | 0.15  | 5.08  |
| GCF_011058<br>715.1 | 0.44 | 0.0 | 0.0 | 26.36 | 0.16  | 3.28  |
| GCF_009857<br>205.1 | 0.44 | 0.0 | 0.0 | 26.45 | 1.24  | 3.21  |
| GCF_009649<br>955.1 | 1.83 | 0.5 | 0.0 | 23.27 | 0.00  | 10.51 |
| GCF_002250<br>075.1 | 1.99 | 1.5 | 0.0 | 27.15 | 0.07  | 10.13 |
| GCF_000145<br>615.1 | 0.48 | 0.2 | 0.0 | 27.95 | 0.09  | 10.13 |
| GCF_001972<br>085.1 | 0.55 | 1.5 | 0.0 | 22.27 | 0.29  | 11.19 |
| GCF_006454<br>545.1 | 0.37 | 1.5 | 0.0 | 22.94 | 0.45  | 11.19 |
| GCF_002946<br>035.1 | 0.37 | 1.5 | 0.0 | 22.34 | 0.33  | 11.19 |
| GCF_009903<br>525.1 | 0.42 | 1.5 | 0.0 | 22.05 | 0.39  | 11.19 |
| GCF_006380<br>905.1 | 0.42 | 1.5 | 0.0 | 21.97 | 0.39  | 11.19 |
| GCF_006379<br>335.1 | 0.42 | 1.5 | 0.0 | 21.89 | 0.43  | 11.19 |
| GCF_902387<br>945.1 | 0.00 | 0.0 | 0.0 | 25.51 | 0.06  | 10.13 |
| GCF_900461<br>315.1 | 0.63 | 0.0 | 0.0 | 23.81 | 0.00  | 15.98 |
| GCF_900461<br>275.1 | 0.00 | 0.0 | 0.0 | 20.68 | 18.47 | 1.55  |

|                     |      |     |     |       |       |       |
|---------------------|------|-----|-----|-------|-------|-------|
| GCF_900105<br>215.1 | 0.63 | 0.4 | 0.0 | 22.16 | 3.69  | 0.65  |
| GCF_020735<br>365.1 | 0.32 | 0.4 | 0.0 | 23.62 | 1.88  | 1.41  |
| GCF_018866<br>245.1 | 0.00 | 0.4 | 0.0 | 26.80 | 0.01  | 0.7   |
| GCF_005848<br>555.1 | 0.32 | 0.4 | 0.0 | 24.59 | 0.58  | 12.21 |
| GCF_003589<br>745.1 | 0.00 | 0.0 | 0.0 | 25.51 | 0.06  | 10.13 |
| GCF_002797<br>975.1 | 0.00 | 0.0 | 0.0 | 24.07 | 5.58  | 15.98 |
| GCF_000686<br>105.1 | 0.95 | 1.1 | 0.0 | 16.92 | 17.19 | 23.71 |
| GCF_000526<br>995.1 | 0.95 | 0.0 | 0.0 | 21.98 | 30.77 | 17.58 |
| GCF_000214<br>435.1 | 0.00 | 1.1 | 0.0 | 29.05 | 0.00  | 9.85  |
| GCF_000159<br>975.2 | 0.00 | 0.0 | 0.0 | 22.20 | 29.11 | 13.24 |
| GCF_000144<br>625.1 | 0.00 | 0.4 | 0.0 | 23.52 | 0.00  | 15.63 |
| GCF_900461<br>125.1 | 0.00 | 0.0 | 0.0 | 20.77 | 5.63  | 17.58 |
| GCF_020215<br>665.1 | 0.00 | 0.0 | 0.0 | 20.09 | 0.15  | 3.89  |
| GCF_014131<br>715.1 | 0.00 | 0.0 | 0.0 | 20.14 | 0.05  | 4.32  |
| GCF_013112<br>015.1 | 1.91 | 0.0 | 0.0 | 20.24 | 0.03  | 1.05  |
| GCF_010669<br>205.1 | 0.00 | 0.0 | 0.0 | 20.25 | 0.04  | 4.33  |
| GCF_004210<br>255.1 | 0.21 | 0.0 | 0.0 | 19.83 | 0.04  | 17.58 |
| GCF_002222<br>595.2 | 0.00 | 0.0 | 0.0 | 24.02 | 0.76  | 10.61 |
| GCF_001689<br>125.2 | 1.91 | 0.0 | 0.0 | 20.89 | 0.02  | 15.77 |

|                     |      |     |     |       |      |       |
|---------------------|------|-----|-----|-------|------|-------|
| GCF_000231<br>405.2 | 0.98 | 0.0 | 0.0 | 25.24 | 0.00 | 10.47 |
| GCF_001577<br>795.1 | 0.38 | 1.5 | 0.0 | 22.46 | 0.41 | 11.19 |
| GCF_000014<br>405.1 | 0.00 | 0.5 | 0.0 | 4.34  | 0.03 | 9.15  |
| GCF_005886<br>215.1 | 0.95 | 0.0 | 0.0 | 18.61 | 0.00 | 16.01 |
| GCF_003482<br>125.1 | 0.76 | 1.5 | 0.0 | 21.92 | 0.44 | 11.19 |
| GCF_902388<br>025.1 | 1.34 | 0.4 | 0.0 | 24.81 | 0.35 | 1.04  |
| GCF_900215<br>405.1 | 0.00 | 0.0 | 0.0 | 21.47 | 0.15 | 10.63 |
| GCF_020735<br>705.1 | 0.00 | 0.8 | 0.0 | 21.33 | 0.12 | 1.59  |
| GCF_020181<br>555.1 | 0.81 | 0.4 | 0.0 | 19.73 | 0.04 | 15.7  |
| GCF_010508<br>875.1 | 0.13 | 0.4 | 0.0 | 21.28 | 0.03 | 15.39 |
| GCF_008727<br>735.1 | 0.00 | 0.4 | 0.0 | 24.76 | 0.02 | 10.09 |
| GCF_005473<br>905.2 | 0.34 | 0.0 | 0.0 | 18.48 | 0.03 | 13.67 |
| GCF_002564<br>085.1 | 0.00 | 0.0 | 0.0 | 21.59 | 0.13 | 10.58 |
| GCF_001998<br>765.1 | 1.34 | 0.4 | 0.0 | 24.81 | 0.35 | 10.61 |
| GCF_001692<br>755.1 | 0.00 | 0.0 | 0.0 | 21.55 | 0.15 | 10.58 |
| GCF_001688<br>625.2 | 0.13 | 0.4 | 0.0 | 22.25 | 0.03 | 15.31 |
| GCF_000255<br>615.2 | 0.00 | 0.0 | 0.0 | 21.59 | 0.13 | 10.58 |
| GCF_000184<br>925.1 | 0.00 | 0.0 | 0.0 | 21.54 | 0.11 | 10.58 |
| GCF_000015<br>865.1 | 0.67 | 0.0 | 0.0 | 21.03 | 0.14 | 10.98 |

|                     |      |     |     |       |       |       |
|---------------------|------|-----|-----|-------|-------|-------|
| GCF_000022<br>065.1 | 1.01 | 0.8 | 0.0 | 21.22 | 0.01  | 11.82 |
| GCF_020297<br>485.1 | 1.69 | 1.9 | 0.0 | 22.38 | 48.00 | 4.78  |
| GCF_016889<br>665.1 | 0.00 | 0.4 | 0.0 | 21.31 | 0.07  | 4.41  |
| GCF_013112<br>035.1 | 0.00 | 0.0 | 0.0 | 20.74 | 0.05  | 20.37 |
| GCF_006538<br>465.1 | 0.00 | 1.1 | 0.0 | 21.47 | 4.71  | 17.33 |
| GCF_002234<br>575.2 | 0.00 | 0.4 | 0.0 | 21.20 | 0.08  | 22.12 |
| GCF_001688<br>665.2 | 1.27 | 1.9 | 0.0 | 19.15 | 1.90  | 22.12 |
| GCF_000210<br>455.1 | 0.37 | 1.5 | 0.0 | 23.18 | 0.39  | 11.19 |
| GCF_020731<br>185.1 | 0.00 | 0.8 | 0.0 | 16.98 | 10.30 | 2.29  |
| GCF_006454<br>575.1 | 0.74 | 2.3 | 0.0 | 22.00 | 0.36  | 11.19 |
| GCF_021495<br>975.1 | 1.38 | 1.5 | 0.0 | 23.20 | 32.31 | 1.37  |
| GCF_020099<br>295.1 | 1.38 | 1.5 | 0.0 | 22.86 | 34.66 | 0.58  |
| GCF_016838<br>665.1 | 0.69 | 0.8 | 0.0 | 22.00 | 0.61  | 0.73  |
| GCF_016798<br>345.1 | 0.00 | 1.1 | 0.0 | 23.42 | 0.56  | 0.81  |
| GCF_014068<br>615.1 | 0.00 | 1.1 | 0.0 | 22.96 | 0.57  | 0.66  |
| GCF_009733<br>885.1 | 0.00 | 1.1 | 0.0 | 23.25 | 0.56  | 10.7  |
| GCF_003345<br>335.1 | 0.13 | 0.8 | 0.0 | 21.42 | 0.61  | 11.19 |
| GCF_003345<br>315.1 | 0.69 | 1.1 | 0.0 | 22.64 | 0.54  | 11.19 |
| GCF_003058<br>445.1 | 0.00 | 1.1 | 0.0 | 22.98 | 0.55  | 10.7  |

|                     |      |     |     |       |       |       |
|---------------------|------|-----|-----|-------|-------|-------|
| GCF_003058<br>345.1 | 0.00 | 1.1 | 0.0 | 23.36 | 0.50  | 10.7  |
| GCF_003017<br>225.1 | 0.00 | 1.1 | 0.0 | 22.82 | 3.89  | 11.19 |
| GCF_003017<br>195.1 | 0.00 | 0.8 | 0.0 | 23.34 | 4.61  | 11.19 |
| GCF_003017<br>145.1 | 0.00 | 0.8 | 0.0 | 23.53 | 4.43  | 11.19 |
| GCF_002866<br>225.1 | 1.38 | 1.1 | 0.0 | 22.12 | 0.61  | 11.19 |
| GCF_002866<br>125.1 | 0.69 | 1.1 | 0.0 | 22.31 | 0.52  | 11.19 |
| GCF_002866<br>045.1 | 0.08 | 1.1 | 0.0 | 21.72 | 0.56  | 11.19 |
| GCF_002865<br>885.1 | 0.00 | 1.1 | 0.0 | 22.07 | 0.54  | 11.19 |
| GCF_002865<br>845.1 | 0.00 | 1.1 | 0.0 | 22.28 | 0.57  | 11.19 |
| GCF_002865<br>805.1 | 0.69 | 1.1 | 0.0 | 22.71 | 0.49  | 10.7  |
| GCF_002865<br>785.1 | 0.08 | 1.1 | 0.0 | 22.04 | 28.40 | 11.19 |
| GCF_002865<br>765.1 | 0.00 | 1.1 | 0.0 | 22.90 | 0.51  | 10.7  |
| GCF_002865<br>745.1 | 0.00 | 1.1 | 0.0 | 22.72 | 0.52  | 10.7  |
| GCF_001921<br>965.1 | 0.00 | 1.1 | 0.0 | 22.56 | 0.60  | 11.19 |
| GCF_001921<br>945.1 | 0.77 | 1.1 | 0.0 | 21.70 | 0.60  | 11.19 |
| GCF_001921<br>905.1 | 0.69 | 1.1 | 0.0 | 22.84 | 0.61  | 10.98 |
| GCF_001889<br>345.1 | 0.00 | 1.1 | 0.0 | 23.13 | 0.58  | 10.7  |
| GCF_001886<br>775.1 | 0.69 | 1.1 | 0.0 | 21.63 | 8.16  | 11.19 |
| GCF_001879<br>625.1 | 0.69 | 1.1 | 0.0 | 22.80 | 0.59  | 11.19 |

|                     |      |     |     |       |       |       |
|---------------------|------|-----|-----|-------|-------|-------|
| GCF_001879<br>605.1 | 0.00 | 1.1 | 0.0 | 22.31 | 0.57  | 11.19 |
| GCF_000829<br>015.1 | 0.00 | 1.1 | 0.0 | 22.97 | 0.57  | 10.7  |
| GCF_000817<br>935.1 | 0.08 | 1.1 | 0.0 | 20.62 | 0.60  | 11.19 |
| GCF_000063<br>585.1 | 0.00 | 1.1 | 0.0 | 23.05 | 0.54  | 10.7  |
| GCF_000022<br>765.1 | 0.00 | 1.1 | 0.0 | 22.13 | 0.58  | 11.19 |
| GCF_000020<br>345.1 | 0.05 | 1.1 | 0.0 | 21.36 | 0.54  | 11.19 |
| GCF_000019<br>545.1 | 0.08 | 1.1 | 0.0 | 21.49 | 0.45  | 11.19 |
| GCF_000019<br>305.1 | 0.00 | 1.1 | 0.0 | 22.06 | 0.57  | 11.19 |
| GCF_000017<br>045.1 | 0.00 | 1.1 | 0.0 | 23.73 | 0.49  | 10.7  |
| GCF_000017<br>025.1 | 0.00 | 1.1 | 0.0 | 23.36 | 0.52  | 10.7  |
| GCF_000016<br>505.1 | 0.00 | 0.4 | 0.0 | 22.00 | 0.12  | 10.98 |
| GCF_000010<br>265.1 | 0.00 | 0.4 | 0.0 | 22.50 | 0.11  | 10.98 |
| GCF_020641<br>055.1 | 0.00 | 1.5 | 0.0 | 20.97 | 25.55 | 0.14  |
| GCF_002441<br>855.2 | 0.00 | 0.8 | 0.0 | 21.79 | 1.07  | 13.44 |
| GCF_001481<br>725.1 | 0.00 | 0.8 | 0.0 | 21.78 | 0.47  | 13.45 |
| GCF_000807<br>675.2 | 0.00 | 0.8 | 0.0 | 21.63 | 0.06  | 13.44 |
| GCF_000152<br>245.2 | 0.00 | 0.8 | 0.0 | 21.45 | 0.45  | 13.44 |
| GCF_019884<br>785.1 | 1.77 | 1.5 | 0.0 | 23.77 | 0.03  | 3.67  |
| GCF_019203<br>185.1 | 1.06 | 0.8 | 0.0 | 26.97 | 0.07  | 0.09  |

|                     |      |     |     |       |       |       |
|---------------------|------|-----|-----|-------|-------|-------|
| GCF_004103<br>735.1 | 0.35 | 0.4 | 0.0 | 20.86 | 0.01  | 10.18 |
| GCF_002998<br>925.1 | 0.00 | 0.4 | 0.0 | 5.91  | 0.10  | 7.37  |
| GCF_002080<br>475.1 | 0.71 | 0.8 | 0.0 | 23.45 | 0.03  | 12.04 |
| GCF_001854<br>185.1 | 0.71 | 0.8 | 0.0 | 23.28 | 0.03  | 12.04 |
| GCF_001042<br>715.1 | 0.71 | 1.1 | 0.0 | 24.01 | 0.02  | 11.74 |
| GCF_000024<br>205.1 | 0.16 | 1.9 | 0.0 | 19.22 | 0.00  | 15.54 |
| GCF_006228<br>565.1 | 0.00 | 1.3 | 0.0 | 27.60 | 0.00  | 10.2  |
| GCF_001729<br>945.1 | 1.83 | 2.1 | 0.0 | 25.40 | 0.00  | 9.83  |
| GCF_001267<br>405.1 | 0.00 | 1.3 | 0.0 | 28.23 | 0.00  | 10.19 |
| GCF_000231<br>385.2 | 0.51 | 1.5 | 0.0 | 22.56 | 0.01  | 13.94 |
| GCF_900636<br>895.1 | 0.00 | 0.5 | 0.0 | 27.48 | 3.04  | 9.29  |
| GCF_020995<br>385.1 | 0.15 | 0.5 | 0.0 | 26.69 | 49.39 | 0.04  |
| GCF_020991<br>185.1 | 0.00 | 0.5 | 0.0 | 27.64 | 0.55  | 0.01  |
| GCF_017840<br>575.1 | 0.00 | 0.5 | 0.0 | 25.36 | 15.72 | 0.55  |
| GCF_017638<br>885.1 | 0.78 | 0.5 | 0.0 | 25.40 | 0.43  | 0.11  |
| GCF_017498<br>665.1 | 0.00 | 0.5 | 0.0 | 27.68 | 2.21  | 0.09  |
| GCF_014841<br>035.1 | 0.39 | 0.5 | 0.0 | 26.34 | 0.19  | 9.2   |
| GCF_009834<br>385.1 | 0.00 | 0.5 | 0.0 | 26.07 | 11.92 | 9.22  |
| GCF_007876<br>425.1 | 1.29 | 1.2 | 0.0 | 25.79 | 3.78  | 9.22  |



|                     |      |     |     |       |      |       |
|---------------------|------|-----|-----|-------|------|-------|
| GCF_005886<br>075.1 | 0.00 | 0.5 | 0.0 | 26.10 | 2.91 | 9.32  |
| GCF_003584<br>685.1 | 0.00 | 0.5 | 0.0 | 26.09 | 3.12 | 9.16  |
| GCF_003428<br>395.1 | 0.00 | 0.2 | 0.0 | 27.14 | 0.09 | 9.15  |
| GCF_003316<br>915.1 | 0.00 | 0.5 | 0.0 | 27.97 | 0.10 | 9.15  |
| GCF_002176<br>855.1 | 0.00 | 0.5 | 0.0 | 26.40 | 0.24 | 9.29  |
| GCF_002176<br>835.1 | 0.78 | 0.7 | 0.0 | 25.81 | 0.36 | 9.19  |
| GCF_000439<br>915.2 | 0.00 | 0.5 | 0.0 | 28.35 | 0.85 | 9.15  |
| GCF_000204<br>985.1 | 0.00 | 0.5 | 0.0 | 27.44 | 0.17 | 9.19  |
| GCF_000091<br>405.1 | 0.00 | 0.2 | 0.0 | 27.93 | 0.17 | 7.38  |
| GCF_000008<br>065.1 | 0.00 | 0.5 | 0.0 | 26.17 | 0.24 | 9.32  |
| GCF_902459<br>515.1 | 0.00 | 0.4 | 0.0 | 22.81 | 0.44 | 10.13 |
| GCF_900604<br>345.1 | 0.81 | 0.4 | 0.0 | 24.58 | 0.02 | 10.13 |
| GCF_900475<br>545.1 | 0.09 | 0.8 | 0.0 | 22.90 | 0.52 | 0.05  |
| GCF_900465<br>025.1 | 1.61 | 1.1 | 0.0 | 22.58 | 3.71 | 2.36  |
| GCF_900461<br>205.1 | 0.00 | 0.8 | 0.0 | 22.34 | 0.45 | 0.12  |
| GCF_900168<br>365.1 | 0.00 | 0.4 | 0.0 | 24.45 | 0.25 | 0.09  |
| GCF_900010<br>805.1 | 1.61 | 2.3 | 0.0 | 19.67 | 0.15 | 0.87  |
| GCF_020911<br>725.1 | 1.61 | 0.4 | 0.0 | 24.72 | 0.04 | 10.98 |
| GCF_020139<br>275.1 | 0.00 | 0.8 | 0.0 | 21.81 | 0.59 | 0.06  |

|                     |      |     |     |       |      |       |
|---------------------|------|-----|-----|-------|------|-------|
| GCF_018223<br>745.1 | 0.81 | 1.9 | 0.0 | 20.48 | 1.14 | 13.78 |
| GCF_018140<br>655.1 | 0.00 | 1.1 | 0.0 | 22.51 | 0.09 | 13.82 |
| GCF_018140<br>595.1 | 1.61 | 2.3 | 0.0 | 20.54 | 0.60 | 0.52  |
| GCF_016027<br>375.1 | 0.00 | 0.8 | 0.0 | 22.42 | 0.49 | 0.12  |
| GCF_016026<br>995.1 | 0.00 | 0.4 | 0.0 | 22.43 | 0.60 | 0.11  |
| GCF_015643<br>605.1 | 1.61 | 2.3 | 0.0 | 20.19 | 0.65 | 15.9  |
| GCF_014137<br>775.1 | 0.81 | 0.8 | 0.0 | 19.32 | 0.08 | 0.05  |
| GCF_014137<br>745.1 | 0.00 | 1.1 | 0.0 | 22.08 | 0.10 | 1.13  |
| GCF_014137<br>665.1 | 0.81 | 0.4 | 0.0 | 19.31 | 0.07 | 0.06  |
| GCF_014131<br>795.1 | 0.27 | 1.1 | 0.0 | 21.73 | 0.07 | 1.81  |
| GCF_013407<br>635.1 | 1.75 | 2.3 | 0.0 | 20.23 | 0.68 | 0.62  |
| GCF_013407<br>215.1 | 1.69 | 2.3 | 0.0 | 20.71 | 0.52 | 0.25  |
| GCF_013297<br>265.1 | 1.69 | 2.3 | 0.0 | 20.57 | 0.51 | 15.9  |
| GCF_013297<br>175.1 | 1.69 | 2.3 | 0.0 | 20.81 | 0.53 | 0.24  |
| GCF_013297<br>125.1 | 1.69 | 1.9 | 0.0 | 19.18 | 0.11 | 0.93  |
| GCF_013297<br>065.1 | 1.69 | 2.3 | 0.0 | 20.61 | 0.49 | 15.9  |
| GCF_013296<br>465.1 | 1.69 | 2.3 | 0.0 | 20.64 | 0.48 | 0.26  |
| GCF_013296<br>445.1 | 1.69 | 2.3 | 0.0 | 20.61 | 0.57 | 15.9  |
| GCF_013296<br>425.1 | 1.69 | 2.3 | 0.0 | 20.79 | 0.52 | 15.9  |

|                     |      |     |     |       |      |      |
|---------------------|------|-----|-----|-------|------|------|
| GCF_013296<br>395.1 | 1.61 | 2.3 | 0.0 | 19.59 | 2.85 | 0.99 |
| GCF_013294<br>755.1 | 1.69 | 2.3 | 0.0 | 20.63 | 0.52 | 15.9 |
| GCF_013294<br>745.1 | 1.69 | 2.3 | 0.0 | 20.59 | 0.47 | 0.23 |
| GCF_013294<br>705.1 | 1.69 | 2.3 | 0.0 | 20.76 | 0.52 | 0.22 |
| GCF_013294<br>675.1 | 1.69 | 2.3 | 0.0 | 20.60 | 0.51 | 15.9 |
| GCF_013294<br>665.1 | 1.69 | 2.3 | 0.0 | 20.61 | 0.51 | 0.23 |
| GCF_013294<br>605.1 | 1.69 | 2.3 | 0.0 | 20.71 | 0.49 | 0.24 |
| GCF_013294<br>555.1 | 1.61 | 2.3 | 0.0 | 19.61 | 2.02 | 0.72 |
| GCF_013294<br>515.1 | 1.69 | 2.3 | 0.0 | 20.46 | 0.48 | 15.9 |
| GCF_013294<br>505.1 | 1.69 | 2.3 | 0.0 | 20.58 | 0.49 | 15.9 |
| GCF_013294<br>475.1 | 1.69 | 2.3 | 0.0 | 20.79 | 0.58 | 0.2  |
| GCF_013294<br>465.1 | 1.69 | 2.3 | 0.0 | 20.59 | 0.48 | 0.23 |
| GCF_013294<br>445.1 | 1.69 | 1.9 | 0.0 | 19.03 | 0.12 | 0.87 |
| GCF_013294<br>405.1 | 1.61 | 2.3 | 0.0 | 20.46 | 5.70 | 0.36 |
| GCF_013294<br>375.1 | 1.61 | 2.3 | 0.0 | 19.50 | 0.15 | 0.88 |
| GCF_013294<br>345.1 | 1.61 | 2.3 | 0.0 | 19.56 | 2.94 | 1.03 |
| GCF_013294<br>325.1 | 1.69 | 2.3 | 0.0 | 20.68 | 0.51 | 15.9 |
| GCF_013294<br>205.1 | 1.61 | 2.3 | 0.0 | 19.51 | 0.17 | 15.9 |
| GCF_013294<br>145.1 | 1.69 | 2.3 | 0.0 | 20.68 | 0.47 | 0.23 |

|                     |      |     |     |       |       |       |
|---------------------|------|-----|-----|-------|-------|-------|
| GCF_013149<br>715.1 | 0.81 | 0.8 | 0.0 | 19.42 | 0.07  | 0.04  |
| GCF_013149<br>705.1 | 0.81 | 0.8 | 0.0 | 19.36 | 0.07  | 0.06  |
| GCF_013149<br>665.1 | 0.81 | 0.8 | 0.0 | 19.27 | 0.07  | 0.12  |
| GCF_013149<br>605.1 | 0.81 | 0.8 | 0.0 | 19.26 | 0.07  | 0.07  |
| GCF_013149<br>565.1 | 1.61 | 2.3 | 0.0 | 19.88 | 10.34 | 1.1   |
| GCF_013149<br>465.1 | 0.81 | 0.8 | 0.0 | 19.50 | 0.07  | 13.67 |
| GCF_013149<br>325.1 | 0.81 | 0.8 | 0.0 | 19.39 | 0.12  | 0.02  |
| GCF_013112<br>415.1 | 0.00 | 1.1 | 0.0 | 22.18 | 0.14  | 1.13  |
| GCF_009650<br>335.1 | 0.00 | 1.1 | 0.0 | 22.29 | 0.06  | 13.67 |
| GCF_009650<br>315.1 | 0.00 | 1.1 | 0.0 | 22.16 | 0.06  | 13.67 |
| GCF_006742<br>065.1 | 0.27 | 1.1 | 0.0 | 21.95 | 0.10  | 13.67 |
| GCF_006016<br>075.1 | 0.81 | 0.8 | 0.0 | 29.01 | 0.06  | 10.13 |
| GCF_005145<br>085.1 | 0.00 | 1.1 | 0.0 | 22.06 | 0.10  | 13.82 |
| GCF_004328<br>885.1 | 0.00 | 0.4 | 0.0 | 24.40 | 0.28  | 10.13 |
| GCF_004101<br>825.1 | 0.00 | 0.8 | 0.0 | 21.21 | 0.24  | 10.18 |
| GCF_003606<br>265.1 | 0.16 | 0.8 | 0.0 | 21.40 | 0.20  | 10.18 |
| GCF_003315<br>755.1 | 0.00 | 1.1 | 0.0 | 22.30 | 0.07  | 13.82 |
| GCF_002327<br>205.1 | 0.00 | 0.4 | 0.0 | 24.05 | 0.26  | 10.13 |
| GCF_002327<br>185.1 | 0.00 | 0.4 | 0.0 | 24.19 | 0.17  | 10.13 |

|                     |      |     |     |       |      |       |
|---------------------|------|-----|-----|-------|------|-------|
| GCF_002003<br>385.1 | 0.81 | 0.8 | 0.0 | 19.30 | 0.06 | 13.67 |
| GCF_002003<br>365.1 | 0.81 | 0.8 | 0.0 | 19.46 | 0.08 | 13.67 |
| GCF_002003<br>345.1 | 1.69 | 2.3 | 0.0 | 20.85 | 0.49 | 15.9  |
| GCF_002003<br>325.1 | 0.81 | 0.8 | 0.0 | 19.29 | 0.07 | 13.67 |
| GCF_002003<br>305.1 | 1.29 | 1.9 | 0.0 | 19.84 | 0.04 | 15.98 |
| GCF_002003<br>285.1 | 0.81 | 0.8 | 0.0 | 19.39 | 0.07 | 13.67 |
| GCF_001991<br>075.2 | 1.61 | 0.8 | 0.0 | 24.88 | 0.10 | 10.13 |
| GCF_001886<br>875.1 | 0.00 | 1.1 | 0.0 | 22.13 | 0.17 | 13.82 |
| GCF_001646<br>605.1 | 0.00 | 1.1 | 0.0 | 22.36 | 0.08 | 13.82 |
| GCF_001456<br>065.2 | 0.00 | 1.5 | 0.0 | 22.12 | 0.10 | 13.82 |
| GCF_001304<br>735.1 | 0.44 | 2.3 | 0.0 | 22.45 | 0.54 | 10.13 |
| GCF_000878<br>275.1 | 0.00 | 1.1 | 0.0 | 22.27 | 0.15 | 13.82 |
| GCF_000833<br>105.2 | 1.61 | 2.3 | 0.0 | 20.79 | 0.42 | 15.98 |
| GCF_000827<br>955.1 | 0.00 | 0.4 | 0.0 | 23.23 | 0.13 | 10.59 |
| GCF_000827<br>935.1 | 0.00 | 0.4 | 0.0 | 23.11 | 0.13 | 10.59 |
| GCF_000767<br>745.1 | 1.61 | 2.3 | 0.0 | 20.35 | 0.60 | 13.78 |
| GCF_000473<br>995.1 | 0.81 | 0.8 | 0.0 | 19.30 | 0.07 | 13.67 |
| GCF_000340<br>885.1 | 1.69 | 1.9 | 0.0 | 19.05 | 0.11 | 16.01 |
| GCF_000020<br>285.1 | 0.00 | 0.4 | 0.0 | 22.76 | 0.13 | 10.7  |

|                     |      |     |      |       |       |       |
|---------------------|------|-----|------|-------|-------|-------|
| GCF_000016<br>965.1 | 1.61 | 2.3 | 0.0  | 20.46 | 0.62  | 13.78 |
| GCF_000013<br>285.1 | 0.00 | 0.8 | 0.0  | 22.66 | 0.54  | 10.13 |
| GCF_002812<br>625.1 | 0.38 | 1.1 | 0.0  | 22.21 | 0.42  | 11.19 |
| GCF_018884<br>665.1 | 0.37 | 1.5 | 0.02 | 22.00 | 0.49  | 0.48  |
| GCF_002082<br>945.2 | 0.96 | 2.7 | 0.0  | 23.28 | 0.49  | 11.19 |
| GCF_000235<br>605.1 | 0.51 | 2.3 | 0.0  | 22.97 | 0.00  | 15.98 |
| GCF_013781<br>885.1 | 1.40 | 1.9 | 0.0  | 22.07 | 0.05  | 1.96  |
| GCF_001465<br>175.1 | 0.00 | 1.1 | 0.0  | 22.42 | 0.09  | 13.82 |
| GCF_018884<br>605.1 | 0.38 | 1.5 | 0.0  | 22.29 | 0.45  | 11.19 |
| GCF_000687<br>955.1 | 0.70 | 1.1 | 0.0  | 23.30 | 33.06 | 10.13 |
| GCF_003482<br>305.1 | 0.47 | 1.5 | 0.0  | 22.48 | 0.36  | 11.19 |
| GCF_017751<br>145.1 | 1.75 | 1.2 | 0.0  | 24.39 | 0.65  | 1.15  |
| GCF_000020<br>485.1 | 0.88 | 2.0 | 0.0  | 26.70 | 0.05  | 9.53  |
| GCF_013295<br>945.1 | 1.69 | 1.9 | 0.0  | 21.00 | 0.55  | 15.9  |
| GCF_009903<br>465.1 | 0.53 | 1.5 | 0.0  | 21.94 | 0.78  | 11.19 |
| GCF_010586<br>925.1 | 0.78 | 1.0 | 0.0  | 24.95 | 0.21  | 9.26  |
| GCF_006380<br>915.1 | 0.42 | 1.5 | 0.02 | 21.77 | 0.44  | 11.19 |
| GCF_014174<br>405.1 | 0.00 | 0.4 | 0.0  | 20.38 | 20.90 | 1.23  |
| GCF_000210<br>415.1 | 0.37 | 1.1 | 0.0  | 22.39 | 0.47  | 11.19 |

|                     |      |     |     |       |       |       |
|---------------------|------|-----|-----|-------|-------|-------|
| GCF_000214<br>455.1 | 0.32 | 1.1 | 0.0 | 26.38 | 16.57 | 10.29 |
| GCF_000007<br>085.1 | 0.60 | 0.6 | 0.0 | 29.83 | 0.15  | 9.5   |
| GCF_900537<br>995.1 | 1.57 | 0.0 | 0.0 | 20.60 | 0.19  | 15.54 |
| GCF_020991<br>205.1 | 0.78 | 0.5 | 0.0 | 26.21 | 1.30  | 0.01  |
| GCF_017894<br>345.1 | 0.00 | 0.5 | 0.0 | 23.63 | 0.44  | 0.09  |
| GCF_902386<br>585.1 | 0.00 | 0.2 | 0.0 | 21.56 | 0.36  | 9.88  |
| GCF_900196<br>735.1 | 0.00 | 0.7 | 0.0 | 4.43  | 0.01  | 0.95  |
| GCF_021091<br>115.1 | 0.00 | 0.7 | 0.0 | 4.96  | 0.01  | 0.42  |
| GCF_020042<br>225.1 | 0.09 | 0.7 | 0.0 | 20.26 | 0.15  | 0.41  |
| GCF_020042<br>125.1 | 0.09 | 0.7 | 0.0 | 20.64 | 0.14  | 0.62  |
| GCF_019443<br>925.1 | 0.00 | 0.2 | 0.0 | 20.81 | 0.45  | 0.53  |
| GCF_018987<br>235.1 | 0.09 | 0.5 | 0.0 | 21.14 | 0.06  | 0.26  |
| GCF_018885<br>325.1 | 0.09 | 0.2 | 0.0 | 20.64 | 0.22  | 0.48  |
| GCF_016767<br>795.1 | 0.09 | 0.5 | 0.0 | 21.50 | 0.10  | 0.36  |
| GCF_016647<br>595.1 | 0.00 | 0.7 | 0.0 | 21.95 | 0.07  | 0.14  |
| GCF_015709<br>185.1 | 0.00 | 0.0 | 0.0 | 22.56 | 0.60  | 9.92  |
| GCF_015377<br>785.1 | 0.00 | 0.7 | 0.0 | 4.56  | 0.01  | 0.56  |
| GCF_014656<br>585.1 | 0.32 | 0.0 | 0.0 | 22.03 | 0.52  | 9.92  |
| GCF_013487<br>905.1 | 0.19 | 0.5 | 0.0 | 19.48 | 0.11  | 0.06  |

|                     |      |     |     |       |      |       |
|---------------------|------|-----|-----|-------|------|-------|
| GCF_013456<br>995.1 | 0.00 | 0.5 | 0.0 | 20.67 | 0.15 | 0.6   |
| GCF_011044<br>195.1 | 0.00 | 0.7 | 0.0 | 4.27  | 0.01 | 0.82  |
| GCF_009933<br>525.1 | 0.19 | 0.7 | 0.0 | 20.10 | 0.22 | 9.67  |
| GCF_009769<br>205.1 | 0.00 | 0.2 | 0.0 | 20.20 | 0.09 | 9.17  |
| GCF_009734<br>125.1 | 0.00 | 0.7 | 0.0 | 4.67  | 0.01 | 9.15  |
| GCF_009184<br>665.1 | 1.21 | 0.5 | 0.0 | 20.71 | 0.50 | 9.82  |
| GCF_006740<br>305.1 | 0.00 | 0.7 | 0.0 | 3.86  | 0.00 | 9.15  |
| GCF_004114<br>755.1 | 0.00 | 0.0 | 0.0 | 22.11 | 0.59 | 9.92  |
| GCF_003999<br>355.1 | 0.97 | 0.5 | 0.0 | 20.44 | 0.20 | 7.2   |
| GCF_003971<br>565.1 | 0.09 | 0.2 | 0.0 | 21.18 | 0.17 | 9.87  |
| GCF_003955<br>865.1 | 0.00 | 0.0 | 0.0 | 22.22 | 0.60 | 9.92  |
| GCF_003795<br>065.1 | 0.65 | 0.7 | 0.0 | 21.38 | 0.16 | 9.81  |
| GCF_003610<br>975.1 | 0.00 | 0.5 | 0.0 | 19.87 | 0.24 | 10.04 |
| GCF_003597<br>655.1 | 0.00 | 0.5 | 0.0 | 4.80  | 0.01 | 9.15  |
| GCF_003351<br>805.1 | 0.00 | 0.7 | 0.0 | 4.72  | 0.00 | 9.15  |
| GCF_002849<br>955.1 | 0.00 | 0.2 | 0.0 | 21.39 | 0.32 | 10.08 |
| GCF_002849<br>935.1 | 0.00 | 0.2 | 0.0 | 20.48 | 0.35 | 10.24 |
| GCF_002285<br>775.1 | 0.00 | 0.7 | 0.0 | 5.87  | 0.01 | 9.95  |
| GCF_002278<br>095.1 | 0.00 | 0.7 | 0.0 | 4.41  | 0.01 | 9.2   |



|                     |      |     |     |       |      |       |
|---------------------|------|-----|-----|-------|------|-------|
| GCF_002142<br>575.1 | 0.00 | 0.7 | 0.0 | 3.80  | 0.01 | 9.15  |
| GCF_001953<br>135.1 | 0.00 | 0.5 | 0.0 | 4.54  | 0.01 | 9.15  |
| GCF_001888<br>965.1 | 0.00 | 0.7 | 0.0 | 4.65  | 0.02 | 9.19  |
| GCF_001888<br>925.1 | 0.65 | 2.0 | 0.0 | 2.92  | 0.01 | 9.15  |
| GCF_001888<br>905.1 | 0.65 | 1.0 | 0.0 | 5.74  | 0.01 | 9.95  |
| GCF_001746<br>265.1 | 0.00 | 0.2 | 0.0 | 21.02 | 0.43 | 9.88  |
| GCF_001702<br>095.1 | 0.00 | 0.2 | 0.0 | 21.56 | 0.36 | 9.88  |
| GCF_001469<br>775.1 | 0.08 | 1.0 | 0.0 | 4.11  | 0.00 | 9.15  |
| GCF_001006<br>025.1 | 0.00 | 0.2 | 0.0 | 19.75 | 0.35 | 10.06 |
| GCF_000525<br>715.1 | 0.32 | 0.0 | 0.0 | 21.14 | 0.32 | 9.1   |
| GCF_000466<br>885.3 | 0.09 | 0.7 | 0.0 | 20.48 | 0.13 | 9.98  |
| GCF_000422<br>165.1 | 0.00 | 0.2 | 0.0 | 19.40 | 0.30 | 10.15 |
| GCF_000214<br>785.1 | 1.21 | 0.5 | 0.0 | 20.08 | 0.56 | 9.87  |
| GCF_000189<br>515.1 | 1.62 | 1.2 | 0.0 | 22.24 | 0.49 | 10.08 |
| GCF_000182<br>835.1 | 0.00 | 0.7 | 0.0 | 4.96  | 0.01 | 9.19  |
| GCF_002970<br>935.1 | 1.13 | 0.0 | 0.0 | 38.02 | 0.28 | 9.77  |
| GCF_002970<br>915.1 | 1.13 | 0.0 | 0.0 | 36.85 | 0.28 | 9.77  |
| GCF_008694<br>205.1 | 0.65 | 0.7 | 0.0 | 20.22 | 2.03 | 8.82  |
| GCF_001874<br>605.1 | 0.64 | 1.5 | 0.0 | 29.15 | 0.00 | 10.19 |

|                     |      |     |     |       |      |       |
|---------------------|------|-----|-----|-------|------|-------|
| GCF_014058<br>685.1 | 0.00 | 0.5 | 0.0 | 27.19 | 0.32 | 9.18  |
| GCF_004010<br>015.1 | 0.00 | 1.0 | 0.0 | 25.96 | 0.48 | 9.15  |
| GCF_000498<br>675.1 | 0.00 | 0.5 | 0.0 | 25.65 | 0.19 | 7.78  |
| GCF_000193<br>435.2 | 0.00 | 0.2 | 0.0 | 22.72 | 1.70 | 10.02 |
| GCF_020887<br>095.1 | 0.00 | 0.5 | 0.0 | 21.71 | 0.10 | 0.8   |
| GCF_002762<br>335.1 | 0.00 | 0.0 | 0.0 | 32.59 | 0.00 | 7.24  |
| GCF_021432<br>145.1 | 0.00 | 1.0 | 0.0 | 22.16 | 0.02 | 0.35  |
| GCF_020883<br>435.1 | 0.00 | 1.0 | 0.0 | 22.06 | 0.02 | 0.34  |
| GCF_020149<br>995.1 | 0.00 | 0.2 | 0.0 | 21.10 | 0.23 | 0.02  |
| GCF_013342<br>945.1 | 0.00 | 0.7 | 0.0 | 22.04 | 0.05 | 9.28  |
| GCF_003952<br>845.1 | 0.00 | 0.5 | 0.0 | 22.16 | 0.02 | 9.22  |
| GCF_003047<br>065.1 | 1.52 | 1.7 | 0.0 | 21.88 | 0.01 | 9.28  |
| GCF_002706<br>375.1 | 0.00 | 0.2 | 0.0 | 20.85 | 0.24 | 9.51  |
| GCF_002286<br>215.1 | 0.00 | 0.7 | 0.0 | 22.00 | 0.04 | 9.28  |
| GCF_002224<br>305.1 | 0.00 | 0.7 | 0.0 | 22.35 | 0.01 | 9.28  |
| GCF_000961<br>015.1 | 0.00 | 0.2 | 0.0 | 20.23 | 0.34 | 10.04 |
| GCF_000934<br>625.1 | 0.00 | 0.7 | 0.0 | 21.84 | 0.03 | 9.28  |
| GCF_000389<br>675.2 | 0.00 | 0.7 | 0.0 | 22.04 | 0.04 | 9.28  |
| GCF_000194<br>115.1 | 0.00 | 0.2 | 0.0 | 21.23 | 0.06 | 9.16  |

|                     |      |     |     |       |       |       |
|---------------------|------|-----|-----|-------|-------|-------|
| GCF_000191<br>545.1 | 0.00 | 0.2 | 0.0 | 21.18 | 0.13  | 9.19  |
| GCF_000011<br>985.1 | 0.00 | 0.7 | 0.0 | 22.03 | 0.04  | 9.28  |
| GCF_021278<br>925.1 | 0.48 | 1.7 | 0.0 | 20.48 | 1.64  | 1.53  |
| GCF_007570<br>935.1 | 0.00 | 0.5 | 0.0 | 20.87 | 39.73 | 9.33  |
| GCF_001888<br>945.1 | 0.00 | 0.7 | 0.0 | 3.62  | 0.00  | 9.15  |
| GCF_022213<br>385.1 | 0.00 | 0.5 | 0.0 | 26.79 | 0.35  | 0.03  |
| GCF_021278<br>945.1 | 0.09 | 0.2 | 0.0 | 21.10 | 0.20  | 0.31  |
| GCF_002849<br>915.1 | 0.00 | 0.2 | 0.0 | 20.83 | 0.34  | 10.03 |
| GCF_004011<br>315.1 | 0.39 | 0.7 | 0.0 | 27.52 | 0.13  | 9.2   |
| GCF_009730<br>255.1 | 0.00 | 0.0 | 0.0 | 22.55 | 0.05  | 5.1   |
| GCF_001936<br>235.1 | 0.00 | 0.2 | 0.0 | 23.36 | 0.19  | 7.22  |
| GCF_001308<br>285.1 | 0.32 | 0.0 | 0.0 | 22.27 | 0.60  | 10.05 |
| GCF_900312<br>975.1 | 0.00 | 0.0 | 0.0 | 26.83 | 0.09  | 1.05  |
| GCF_019597<br>925.1 | 0.00 | 0.0 | 0.0 | 24.37 | 0.06  | 1.25  |
| GCF_014287<br>355.1 | 0.00 | 0.4 | 0.0 | 24.63 | 35.82 | 10.61 |
| GCF_000145<br>275.1 | 1.61 | 1.9 | 0.0 | 17.96 | 0.02  | 15.83 |
| GCF_021398<br>395.1 | 0.00 | 0.2 | 0.0 | 21.29 | 5.50  | 0.28  |
| GCF_002075<br>105.1 | 0.32 | 0.5 | 0.0 | 20.14 | 0.20  | 7.2   |
| GCF_000092<br>405.1 | 0.51 | 0.8 | 0.0 | 26.17 | 0.01  | 10.16 |

|                     |      |     |     |       |       |       |
|---------------------|------|-----|-----|-------|-------|-------|
| GCF_000686<br>065.1 | 0.40 | 0.0 | 0.0 | 20.06 | 21.52 | 10.8  |
| GCF_000746<br>025.2 | 1.91 | 1.4 | 0.0 | 27.58 | 0.00  | 10.66 |
| GCF_009730<br>275.1 | 0.09 | 0.7 | 0.0 | 21.36 | 0.08  | 9.87  |
| GCF_009498<br>395.1 | 0.00 | 0.2 | 0.0 | 19.30 | 0.31  | 10.06 |
| GCF_001888<br>985.1 | 0.00 | 0.7 | 0.0 | 1.57  | 0.01  | 9.15  |
| GCF_000015<br>385.1 | 0.00 | 0.5 | 0.0 | 20.86 | 0.46  | 9.88  |
| GCF_900155<br>615.1 | 0.00 | 0.4 | 0.0 | 22.62 | 14.51 | 1.29  |
| GCF_022174<br>665.1 | 0.00 | 0.0 | 0.0 | 21.87 | 0.04  | 1.05  |
| GCF_014467<br>055.1 | 0.00 | 0.4 | 0.0 | 24.28 | 0.00  | 1.61  |
| GCF_013340<br>725.1 | 0.00 | 0.8 | 0.0 | 28.99 | 0.09  | 8.58  |
| GCF_013315<br>815.1 | 0.00 | 1.6 | 0.0 | 29.92 | 0.10  | 9.05  |
| GCF_006714<br>885.1 | 1.36 | 2.4 | 0.0 | 24.75 | 21.38 | 13.44 |
| GCF_004154<br>955.1 | 0.00 | 0.0 | 0.0 | 22.94 | 0.26  | 10.55 |
| GCF_002564<br>155.1 | 0.00 | 0.0 | 0.0 | 21.95 | 1.05  | 10.56 |
| GCF_020892<br>115.1 | 0.00 | 0.0 | 0.0 | 24.79 | 0.04  | 0.41  |
| GCF_000723<br>465.1 | 0.00 | 0.0 | 0.0 | 20.06 | 0.05  | 10.62 |
| GCF_900461<br>425.1 | 0.14 | 1.9 | 0.0 | 24.31 | 1.21  | 10.13 |
| GCF_900447<br>145.1 | 0.14 | 1.9 | 0.0 | 24.22 | 1.05  | 0.0   |
| GCF_900187<br>165.1 | 0.87 | 0.4 | 0.0 | 27.27 | 0.24  | 0.01  |

|                     |      |     |     |       |       |       |
|---------------------|------|-----|-----|-------|-------|-------|
| GCF_019056<br>555.1 | 0.74 | 1.5 | 0.0 | 22.18 | 0.85  | 13.67 |
| GCF_004006<br>395.2 | 1.76 | 1.1 | 0.0 | 22.71 | 0.34  | 13.67 |
| GCF_003013<br>635.1 | 0.10 | 1.9 | 0.0 | 25.01 | 0.16  | 10.13 |
| GCF_001484<br>725.1 | 0.50 | 1.5 | 0.0 | 22.92 | 38.58 | 12.63 |
| GCF_000253<br>195.1 | 0.00 | 0.8 | 0.0 | 22.62 | 0.54  | 10.7  |
| GCF_000143<br>685.1 | 0.50 | 1.5 | 0.0 | 23.17 | 41.85 | 13.67 |
| GCF_000484<br>505.1 | 0.50 | 1.5 | 0.0 | 22.82 | 38.96 | 12.63 |
| GCF_012317<br>385.1 | 0.00 | 1.1 | 0.0 | 24.06 | 0.24  | 10.13 |
| GCF_010669<br>305.1 | 1.06 | 0.4 | 0.0 | 19.34 | 0.00  | 10.61 |
| GCF_000018<br>325.1 | 0.95 | 0.4 | 0.0 | 25.01 | 0.01  | 10.69 |
| GCF_000270<br>305.1 | 1.72 | 0.0 | 0.0 | 25.00 | 0.03  | 10.29 |
| GCF_900446<br>985.1 | 0.87 | 0.8 | 0.0 | 26.88 | 1.72  | 0.23  |
| GCF_008281<br>175.1 | 0.00 | 0.4 | 0.0 | 23.67 | 0.00  | 13.24 |
| GCF_000305<br>935.1 | 0.00 | 0.8 | 0.0 | 24.52 | 0.03  | 9.85  |
| GCF_000196<br>455.1 | 1.40 | 1.1 | 0.0 | 27.29 | 0.01  | 10.56 |
| GCF_900452<br>355.1 | 0.43 | 1.2 | 0.0 | 27.92 | 0.29  | 1.56  |
| GCF_013487<br>865.1 | 0.00 | 0.5 | 0.0 | 26.94 | 0.23  | 0.04  |
| GCF_001714<br>745.1 | 0.00 | 0.5 | 0.0 | 26.51 | 0.35  | 9.23  |
| GCF_000014<br>425.1 | 0.00 | 0.5 | 0.0 | 27.04 | 0.36  | 9.15  |

|                     |      |     |     |       |       |       |
|---------------------|------|-----|-----|-------|-------|-------|
| GCF_900070<br>325.1 | 1.68 | 0.0 | 0.0 | 25.38 | 0.08  | 0.36  |
| GCF_900447<br>065.1 | 0.00 | 0.4 | 0.0 | 22.86 | 0.38  | 0.29  |
| GCF_013407<br>315.1 | 0.81 | 0.4 | 0.0 | 19.28 | 0.06  | 0.07  |
| GCF_013297<br>165.1 | 1.61 | 1.9 | 0.0 | 19.00 | 0.09  | 1.05  |
| GCF_003628<br>755.1 | 0.81 | 0.4 | 0.0 | 23.83 | 0.03  | 10.14 |
| GCF_002312<br>985.1 | 0.00 | 0.8 | 0.0 | 22.37 | 0.54  | 10.13 |
| GCF_012848<br>655.1 | 1.52 | 1.0 | 0.0 | 20.28 | 0.04  | 7.2   |
| GCF_008831<br>485.1 | 0.87 | 0.2 | 0.0 | 21.04 | 0.03  | 7.2   |
| GCF_001042<br>405.1 | 1.39 | 1.0 | 0.0 | 20.22 | 0.15  | 7.35  |
| GCF_000056<br>065.1 | 0.00 | 0.5 | 0.0 | 4.44  | 0.01  | 9.15  |
| GCF_014467<br>015.1 | 0.00 | 1.4 | 0.0 | 23.53 | 0.02  | 1.36  |
| GCF_000020<br>005.1 | 1.69 | 1.2 | 0.0 | 23.05 | 0.00  | 10.52 |
| GCF_003057<br>965.1 | 1.72 | 0.2 | 0.0 | 25.45 | 0.10  | 8.32  |
| GCF_000212<br>395.1 | 1.72 | 0.4 | 0.0 | 25.40 | 0.03  | 8.82  |
| GCF_000007<br>625.1 | 0.14 | 1.9 | 0.0 | 24.51 | 0.49  | 10.13 |
| GCF_016766<br>995.1 | 0.50 | 1.5 | 0.0 | 22.27 | 0.29  | 0.41  |
| GCF_020892<br>095.1 | 0.88 | 0.0 | 0.0 | 25.90 | 0.08  | 0.66  |
| GCF_000328<br>625.1 | 0.00 | 1.2 | 0.0 | 27.01 | 0.03  | 9.84  |
| GCF_001940<br>235.1 | 0.71 | 1.1 | 0.0 | 20.83 | 15.95 | 10.13 |

|                     |      |     |     |       |       |       |
|---------------------|------|-----|-----|-------|-------|-------|
| GCF_003932<br>015.1 | 0.32 | 0.4 | 0.0 | 26.59 | 0.00  | 9.52  |
| GCF_000018<br>425.1 | 0.32 | 0.4 | 0.0 | 25.55 | 0.00  | 10.09 |
| GCF_000092<br>965.1 | 0.24 | 0.0 | 0.0 | 30.81 | 1.75  | 9.83  |
| GCF_017301<br>615.1 | 1.80 | 1.6 | 0.0 | 28.54 | 0.01  | 0.81  |
| GCF_003457<br>035.1 | 0.67 | 1.1 | 0.0 | 21.96 | 0.32  | 11.19 |
| GCF_003457<br>015.1 | 0.67 | 1.1 | 0.0 | 21.95 | 0.29  | 11.19 |
| GCF_003456<br>975.1 | 0.67 | 1.1 | 0.0 | 21.89 | 0.34  | 11.19 |
| GCF_003697<br>225.1 | 0.34 | 1.5 | 0.0 | 22.66 | 0.33  | 10.98 |
| GCF_003697<br>205.1 | 0.34 | 1.5 | 0.0 | 22.59 | 0.36  | 10.98 |
| GCF_000009<br>905.1 | 0.03 | 0.8 | 0.0 | 21.80 | 0.00  | 11.85 |
| GCF_000732<br>725.1 | 1.63 | 0.8 | 0.0 | 20.85 | 16.97 | 15.54 |
| GCF_004103<br>755.1 | 0.00 | 1.6 | 0.0 | 26.15 | 0.02  | 10.66 |
| GCF_902376<br>065.1 | 0.81 | 0.8 | 0.0 | 26.43 | 18.91 | 0.46  |
| GCF_900087<br>015.1 | 0.81 | 0.8 | 0.0 | 26.43 | 18.91 | 0.46  |
| GCF_002285<br>495.1 | 1.24 | 1.5 | 0.0 | 25.63 | 0.20  | 9.76  |
| GCF_000213<br>255.1 | 1.48 | 0.8 | 0.0 | 24.80 | 0.02  | 10.56 |
| GCF_900683<br>755.1 | 0.16 | 0.8 | 0.0 | 19.40 | 0.05  | 15.74 |
| GCF_000243<br>135.2 | 1.36 | 0.0 | 0.0 | 24.14 | 0.01  | 10.6  |
| GCF_003614<br>235.1 | 0.69 | 1.1 | 0.0 | 23.85 | 36.30 | 9.77  |

|                     |      |     |     |       |       |       |
|---------------------|------|-----|-----|-------|-------|-------|
| GCF_000163<br>895.2 | 0.70 | 1.9 | 0.0 | 27.12 | 0.40  | 7.39  |
| GCF_900683<br>775.1 | 0.00 | 0.8 | 0.0 | 20.78 | 0.06  | 15.66 |
| GCF_000688<br>015.1 | 0.35 | 0.4 | 0.0 | 18.82 | 14.46 | 8.87  |
| GCF_014303<br>955.1 | 1.68 | 1.6 | 0.0 | 23.16 | 0.00  | 2.16  |
| GCF_009738<br>535.1 | 0.65 | 0.2 | 0.0 | 22.61 | 0.10  | 7.35  |
| GCF_003173<br>695.1 | 1.14 | 0.5 | 0.0 | 18.55 | 0.64  | 7.78  |
| GCF_000761<br>135.1 | 1.14 | 0.5 | 0.0 | 18.57 | 0.39  | 7.78  |
| GCF_900095<br>895.1 | 0.93 | 2.3 | 0.0 | 23.32 | 0.47  | 3.09  |
| GCF_018603<br>475.1 | 0.37 | 1.5 | 0.0 | 23.35 | 0.27  | 0.75  |
| GCF_018603<br>455.1 | 0.37 | 1.5 | 0.0 | 23.26 | 0.26  | 0.75  |
| GCF_018603<br>395.1 | 0.37 | 1.5 | 0.0 | 23.28 | 0.28  | 0.75  |
| GCF_016767<br>135.1 | 1.99 | 1.9 | 0.0 | 22.36 | 0.28  | 0.66  |
| GCF_016767<br>115.1 | 1.83 | 1.5 | 0.0 | 22.56 | 0.28  | 10.98 |
| GCF_016767<br>095.1 | 1.42 | 3.4 | 0.0 | 22.85 | 0.40  | 2.95  |
| GCF_016767<br>055.1 | 0.99 | 1.5 | 0.0 | 22.86 | 0.39  | 10.98 |
| GCF_016767<br>035.1 | 0.99 | 1.5 | 0.0 | 22.35 | 0.35  | 0.47  |
| GCF_016767<br>015.1 | 0.99 | 1.5 | 0.0 | 22.22 | 0.30  | 1.43  |
| GCF_016766<br>975.1 | 1.47 | 1.9 | 0.0 | 22.91 | 0.37  | 1.36  |
| GCF_016766<br>955.1 | 0.69 | 1.5 | 0.0 | 23.47 | 0.43  | 1.17  |



|                     |      |     |      |       |       |       |
|---------------------|------|-----|------|-------|-------|-------|
| GCF_003482<br>365.1 | 0.53 | 1.5 | 0.0  | 22.95 | 0.39  | 10.98 |
| GCF_003482<br>165.1 | 0.53 | 1.5 | 0.0  | 23.18 | 0.34  | 11.19 |
| GCF_002946<br>555.2 | 0.53 | 1.5 | 0.0  | 23.06 | 0.34  | 10.98 |
| GCF_002946<br>535.2 | 0.53 | 1.5 | 0.0  | 22.87 | 0.35  | 10.98 |
| GCF_002946<br>515.2 | 0.53 | 1.5 | 0.0  | 23.01 | 0.34  | 10.98 |
| GCF_001972<br>115.1 | 0.34 | 1.5 | 0.02 | 22.97 | 0.39  | 10.98 |
| GCF_018884<br>725.1 | 0.50 | 1.5 | 0.0  | 22.46 | 0.25  | 0.51  |
| GCF_003287<br>895.1 | 0.32 | 0.4 | 0.0  | 25.04 | 0.14  | 10.66 |
| GCF_000210<br>435.1 | 0.37 | 1.5 | 0.0  | 23.07 | 0.42  | 10.98 |
| GCF_000144<br>695.1 | 0.00 | 0.8 | 0.0  | 28.70 | 0.02  | 9.91  |
| GCF_019469<br>365.1 | 0.84 | 0.5 | 0.0  | 19.91 | 0.00  | 9.19  |
| GCF_019469<br>345.1 | 1.58 | 0.5 | 0.0  | 18.79 | 0.01  | 1.5   |
| GCF_019469<br>325.1 | 1.49 | 0.2 | 0.0  | 19.89 | 0.00  | 0.87  |
| GCF_019469<br>265.1 | 1.49 | 0.5 | 0.0  | 20.01 | 0.01  | 1.11  |
| GCF_003202<br>825.1 | 1.62 | 0.2 | 0.0  | 18.72 | 27.96 | 9.29  |
| GCF_003151<br>025.1 | 0.97 | 0.5 | 0.0  | 18.87 | 0.04  | 9.18  |
| GCF_000014<br>725.1 | 0.21 | 1.5 | 0.0  | 23.19 | 0.00  | 10.38 |
| GCF_003150<br>935.1 | 0.76 | 0.5 | 0.0  | 19.31 | 0.00  | 5.54  |
| GCF_015140<br>235.1 | 0.00 | 0.0 | 0.0  | 24.62 | 0.04  | 1.24  |

|                     |      |     |     |       |       |       |
|---------------------|------|-----|-----|-------|-------|-------|
| GCF_005222<br>505.1 | 0.34 | 0.0 | 0.0 | 23.79 | 0.01  | 10.45 |
| GCF_005121<br>165.2 | 0.00 | 0.0 | 0.0 | 21.21 | 42.86 | 14.17 |
| GCF_003612<br>855.1 | 0.34 | 0.0 | 0.0 | 23.55 | 0.01  | 10.52 |
| GCF_003612<br>835.1 | 0.34 | 0.0 | 0.0 | 24.08 | 0.01  | 10.45 |
| GCF_003020<br>045.1 | 0.34 | 0.0 | 0.0 | 23.77 | 0.01  | 10.45 |
| GCF_000178<br>115.2 | 0.34 | 0.0 | 0.0 | 23.65 | 0.01  | 10.45 |
| GCF_009734<br>445.1 | 1.06 | 0.4 | 0.0 | 25.56 | 0.02  | 10.11 |
| GCF_000213<br>235.1 | 0.96 | 1.3 | 0.0 | 28.99 | 0.00  | 10.06 |
| GCF_000328<br>765.2 | 0.96 | 1.1 | 0.0 | 28.87 | 0.00  | 10.06 |
| GCF_001561<br>955.1 | 0.00 | 1.1 | 0.0 | 21.87 | 0.00  | 10.58 |
| GCF_010120<br>715.1 | 0.35 | 1.5 | 0.0 | 17.98 | 0.01  | 10.66 |
| GCF_015159<br>595.1 | 0.00 | 0.4 | 0.0 | 25.31 | 0.00  | 10.85 |
| GCF_006408<br>235.1 | 0.37 | 1.5 | 0.0 | 22.64 | 0.36  | 11.19 |
| GCF_010669<br>085.1 | 0.35 | 0.4 | 0.0 | 26.13 | 0.06  | 9.5   |
| GCF_003600<br>355.1 | 1.38 | 0.4 | 0.0 | 26.26 | 0.06  | 10.13 |
| GCF_013363<br>915.1 | 0.00 | 0.5 | 0.0 | 23.80 | 18.35 | 0.34  |
| GCF_000144<br>645.1 | 0.00 | 0.2 | 0.0 | 30.42 | 0.00  | 9.75  |
| GCF_000955<br>745.1 | 1.11 | 0.6 | 0.0 | 23.74 | 43.82 | 10.37 |
| GCF_018919<br>205.1 | 0.67 | 0.0 | 0.0 | 22.31 | 7.18  | 12.1  |

|                     |      |     |     |       |       |       |
|---------------------|------|-----|-----|-------|-------|-------|
| GCF_003718<br>715.1 | 1.61 | 0.8 | 0.0 | 25.98 | 0.07  | 10.13 |
| GCF_000025<br>225.2 | 0.71 | 0.0 | 0.0 | 27.62 | 0.14  | 5.19  |
| GCF_003017<br>335.1 | 0.00 | 1.1 | 0.0 | 23.01 | 24.47 | 10.98 |
| GCF_018408<br>575.1 | 0.67 | 0.4 | 0.0 | 23.26 | 0.10  | 0.47  |

**Table S1: Level of contamination estimation in reference genomes for the six tools**

| type       | rank    | # simulations |
|------------|---------|---------------|
| rate0-all  | phylum  | 92            |
| rate0-all  | class   | 133           |
| rate0-all  | order   | 114           |
| rate0-all  | family  | 132           |
| rate0-all  | genus   | 117           |
| rate0-all  | species | 89            |
| rate10-all | phylum  | 38            |
| rate10-all | class   | 109           |
| rate10-all | order   | 125           |
| rate10-all | family  | 79            |
| rate10-all | genus   | 107           |
| rate10-all | species | 44            |
| rate25-all | phylum  | 63            |
| rate25-all | class   | 52            |
| rate25-all | order   | 137           |
| rate25-all | family  | 87            |
| rate25-all | genus   | 134           |
| rate25-all | species | 100           |

|                   |         |     |
|-------------------|---------|-----|
| rate0-redundant   | phylum  | 67  |
| rate0-redundant   | class   | 114 |
| rate0-redundant   | order   | 108 |
| rate0-redundant   | family  | 115 |
| rate0-redundant   | genus   | 120 |
| rate0-redundant   | species | 153 |
| rate0-replacement | phylum  | 83  |
| rate0-replacement | class   | 110 |
| rate0-replacement | order   | 129 |
| rate0-replacement | family  | 52  |
| rate0-replacement | genus   | 126 |
| rate0-replacement | species | 153 |
| rate0-single      | phylum  | 106 |
| rate0-single      | class   | 121 |
| rate0-single      | order   | 118 |
| rate0-single      | family  | 66  |
| rate0-single      | genus   | 138 |
| rate0-single      | species | 107 |

**Table S2: Number of simulations used.**

| trial      | rank    | redundant level | replacement level | single level | median simulation  |
|------------|---------|-----------------|-------------------|--------------|--------------------|
| rate0-all  | phylum  | 2.0             | 2.0               | 4.0          | 4.811932623820972  |
| rate0-all  | class   | 2.0             | 2.0               | 4.0          | 4.873136198540901  |
| rate0-all  | order   | 2.0             | 2.0               | 4.0          | 5.019076210557307  |
| rate0-all  | family  | 3.0             | 3.0               | 4.0          | 6.1572178296457345 |
| rate0-all  | genus   | 4.0             | 4.0               | 3.0          | 6.577107768849444  |
| rate0-all  | species | 4.0             | 4.0               | 2.0          | 6.13509647963616   |
| rate10-all | phylum  | 2.0             | 2.0               | 4.0          | 4.834503241391079  |
| rate10-all | class   | 2.0             | 2.0               | 4.0          | 4.878188356692574  |

|                   |         |     |     |     |                    |
|-------------------|---------|-----|-----|-----|--------------------|
| rate10-all        | order   | 2.0 | 2.0 | 4.0 | 4.846119892534356  |
| rate10-all        | family  | 3.0 | 3.0 | 4.0 | 6.3780520629573765 |
| rate10-all        | genus   | 4.0 | 4.0 | 3.0 | 6.756596677229247  |
| rate10-all        | species | 4.0 | 2.0 | 4.0 | 5.846661435621631  |
| rate25-all        | phylum  | 2.0 | 2.0 | 4.0 | 4.908778572089017  |
| rate25-all        | class   | 3.0 | 3.0 | 4.0 | 6.272828793654588  |
| rate25-all        | order   | 2.0 | 2.0 | 4.0 | 5.017066148552706  |
| rate25-all        | family  | 3.0 | 3.0 | 4.0 | 5.839175682683982  |
| rate25-all        | genus   | 4.0 | 4.0 | 3.0 | 6.72012660353524   |
| rate25-all        | species | 4.0 | 4.0 | 2.0 | 5.8049846004168515 |
| rate0-redundant   | phylum  | 4.0 | 0.0 | 0.0 | 2.6791541661854485 |
| rate0-redundant   | class   | 4.0 | 0.0 | 0.0 | 2.530434968221652  |
| rate0-redundant   | order   | 4.0 | 0.0 | 0.0 | 2.669250167328002  |
| rate0-redundant   | family  | 6.0 | 0.0 | 0.0 | 3.891735096323639  |
| rate0-duplication | genus   | 8.0 | 0.0 | 0.0 | 5.2260866932698065 |
| rate0-redundant   | species | 8.0 | 0.0 | 0.0 | 5.008258180235766  |
| rate0-replacement | phylum  | 0.0 | 4.0 | 0.0 | 2.7405731208809545 |
| rate0-replacement | class   | 0.0 | 4.0 | 0.0 | 2.851081057089025  |
| rate0-replacement | order   | 0.0 | 4.0 | 0.0 | 2.8589954433991465 |
| rate0-replacement | family  | 0.0 | 6.0 | 0.0 | 4.151663232543372  |
| rate0-replacement | genus   | 0.0 | 8.0 | 0.0 | 5.361825783843343  |
| rate0-replacement | species | 0.0 | 8.0 | 0.0 | 5.2731246552877575 |
| rate0-single      | phylum  | 0.0 | 0.0 | 8.0 | 4.113109358121008  |
| rate0-single      | class   | 0.0 | 0.0 | 8.0 | 4.756249845972857  |

|              |         |     |     |     |                    |
|--------------|---------|-----|-----|-----|--------------------|
| rate0-single | order   | 0.0 | 0.0 | 8.0 | 4.444640457488092  |
| rate0-single | family  | 0.0 | 0.0 | 8.0 | 4.73017412136555   |
| rate0-single | genus   | 0.0 | 0.0 | 3.0 | 1.6826151227745412 |
| rate0-single | species | 0.0 | 0.0 | 2.0 | 1.017128662251577  |

**Table S3: Chimeric levels of the simulations.**

| type      | rank   | tool     | percentage of underdetection | median under detection | median simulation |
|-----------|--------|----------|------------------------------|------------------------|-------------------|
| rate0-all | phylum | CheckM   | 2.1739130434782608           | 0.547367806281502      | 4.811932623820972 |
| rate0-all | phylum | BUSCO    | 20.652173913043477           | 2.9391841151873885     | 4.811932623820972 |
| rate0-all | phylum | GUNC     | 59.78260869565217            | 4.85858972795982       | 4.811932623820972 |
| rate0-all | phylum | Physeter | 30.434782608695656           | 2.43565650512042       | 4.811932623820972 |
| rate0-all | phylum | Kraken2  | 16.304347826086957           | 0.12644517470050687    | 4.811932623820972 |
| rate0-all | phylum | CheckM2  | 2.1739130434782608           | 0.34084134735905547    | 4.811932623820972 |
| rate0-all | class  | CheckM   | 3.007518796992481            | 1.341675015238512      | 4.873136198540901 |
| rate0-all | class  | BUSCO    | 8.270676691729323            | 0.8906496557598418     | 4.873136198540901 |
| rate0-all | class  | GUNC     | 65.41353383458647            | 4.852431908251488      | 4.873136198540901 |
| rate0-all | class  | Physeter | 0                            | NA                     | 4.873136198540901 |
| rate0-all | class  | Kraken2  | 30.075187969924812           | 2.1689779719793023     | 4.873136198540901 |
| rate0-all | class  | CheckM2  | 6.015037593984962            | 0.9509236442434488     | 4.873136198540901 |
| rate0-all | order  | CheckM   | 7.894736842105263            | 3.672384429609872      | 5.019076210557307 |
| rate0-all | order  | BUSCO    | 15.789473684210526           | 1.2571785767979746     | 5.019076210557307 |

|           |         |          |                    |                     |                    |
|-----------|---------|----------|--------------------|---------------------|--------------------|
| rate0-all | order   | GUNC     | 78.94736842105263  | 4.98685311620279    | 5.019076210557307  |
| rate0-all | order   | Physeter | 0                  | NA                  | 5.019076210557307  |
| rate0-all | order   | Kraken2  | 13.157894736842104 | 0.08705687914697613 | 5.019076210557307  |
| rate0-all | order   | CheckM2  | 13.157894736842104 | 0.6699853979044166  | 5.019076210557307  |
| rate0-all | family  | CheckM   | 0                  | NA                  | 6.1572178296457345 |
| rate0-all | family  | BUSCO    | 3.787878787878788  | 0.8099278755693158  | 6.1572178296457345 |
| rate0-all | family  | GUNC     | 63.63636363636363  | 6.155475937044468   | 6.1572178296457345 |
| rate0-all | family  | Physeter | 0                  | NA                  | 6.1572178296457345 |
| rate0-all | family  | Kraken2  | 15.909090909090909 | 0.48133315562017387 | 6.1572178296457345 |
| rate0-all | family  | CheckM2  | 6.818181818181818  | 1.216142742601419   | 6.1572178296457345 |
| rate0-all | genus   | CheckM   | 5.982905982905983  | 3.2880552800398446  | 6.577107768849444  |
| rate0-all | genus   | BUSCO    | 11.111111111111111 | 1.6897786638765142  | 6.577107768849444  |
| rate0-all | genus   | GUNC     | 100.0              | 6.566047006234399   | 6.577107768849444  |
| rate0-all | genus   | Physeter | 2.564102564102564  | 1.6127173173577631  | 6.577107768849444  |
| rate0-all | genus   | Kraken2  | 51.28205128205128  | 3.702722366008586   | 6.577107768849444  |
| rate0-all | genus   | CheckM2  | 12.82051282051282  | 0.8280552800398446  | 6.577107768849444  |
| rate0-all | species | CheckM   | 19.101123595505616 | 1.0230093681452876  | 6.13509647963616   |
| rate0-all | species | BUSCO    | 33.70786516853933  | 2.966149927016671   | 6.13509647963616   |
| rate0-all | species | GUNC     | 100.0              | 6.099406536092411   | 6.13509647963616   |

|                 |         |          |                    |                      |                    |
|-----------------|---------|----------|--------------------|----------------------|--------------------|
| rate0-all       | species | Physeter | 2.247191011235955  | 1.1266853151578897   | 6.13509647963616   |
| rate0-all       | species | Kraken2  | 97.75280898876404  | 5.708448938543611    | 6.13509647963616   |
| rate0-all       | species | CheckM2  | 23.595505617977526 | 1.17896236484225     | 6.13509647963616   |
| rate0-redundant | phylum  | CheckM   | 0                  | NA                   | 2.6791541661854485 |
| rate0-redundant | phylum  | BUSCO    | 10.44776119402985  | 0.8777160613884001   | 2.6791541661854485 |
| rate0-redundant | phylum  | GUNC     | 49.25373134328358  | 2.7680049896122947   | 2.6791541661854485 |
| rate0-redundant | phylum  | Physeter | 32.83582089552239  | 0.2752726041623468   | 2.6791541661854485 |
| rate0-redundant | phylum  | Kraken2  | 10.44776119402985  | 0.9663416075099855   | 2.6791541661854485 |
| rate0-redundant | phylum  | CheckM2  | 0                  | NA                   | 2.6791541661854485 |
| rate0-redundant | class   | CheckM   | 0.8771929824561403 | 0.0738489295303495   | 2.530434968221652  |
| rate0-redundant | class   | BUSCO    | 0.8771929824561403 | 2.0638489295303493   | 2.530434968221652  |
| rate0-redundant | class   | GUNC     | 63.1578947368421   | 2.518422922309708    | 2.530434968221652  |
| rate0-redundant | class   | Physeter | 0                  | NA                   | 2.530434968221652  |
| rate0-redundant | class   | Kraken2  | 4.385964912280701  | 0.007164387608035838 | 2.530434968221652  |
| rate0-redundant | class   | CheckM2  | 0                  | NA                   | 2.530434968221652  |
| rate0-redundant | order   | CheckM   | 0.9259259259259258 | 0.6612448837864955   | 2.669250167328002  |
| rate0-redundant | order   | BUSCO    | 0.9259259259259258 | 0.08914031096218045  | 2.669250167328002  |
| rate0-redundant | order   | GUNC     | 62.03703703703704  | 2.6702495466883254   | 2.669250167328002  |
| rate0-redundant | order   | Physeter | 0                  | NA                   | 2.669250167328002  |



|                 |         |          |                    |                     |                    |
|-----------------|---------|----------|--------------------|---------------------|--------------------|
| rate0-redundant | order   | Kraken2  | 13.88888888888889  | 0.1230292890051256  | 2.669250167328002  |
| rate0-redundant | order   | CheckM2  | 0                  | NA                  | 2.669250167328002  |
| rate0-redundant | family  | CheckM   | 0                  | NA                  | 3.891735096323639  |
| rate0-redundant | family  | BUSCO    | 0                  | NA                  | 3.891735096323639  |
| rate0-redundant | family  | GUNC     | 71.30434782608695  | 3.797801660687545   | 3.891735096323639  |
| rate0-redundant | family  | Physeter | 0                  | NA                  | 3.891735096323639  |
| rate0-redundant | family  | Kraken2  | 4.3478260869565215 | 0.7405467250892177  | 3.891735096323639  |
| rate0-redundant | family  | CheckM2  | 0                  | NA                  | 3.891735096323639  |
| rate0-redundant | genus   | CheckM   | 0                  | NA                  | 5.2260866932698065 |
| rate0-redundant | genus   | BUSCO    | 0.8333333333333334 | 1.527495927267415   | 5.2260866932698065 |
| rate0-redundant | genus   | GUNC     | 98.33333333333333  | 5.221863701029459   | 5.2260866932698065 |
| rate0-redundant | genus   | Physeter | 3.3333333333333335 | 0.9145162254893897  | 5.2260866932698065 |
| rate0-redundant | genus   | Kraken2  | 48.33333333333333  | 2.925491955486992   | 5.2260866932698065 |
| rate0-redundant | genus   | CheckM2  | 0                  | NA                  | 5.2260866932698065 |
| rate0-redundant | species | CheckM   | 2.6143790849673203 | 1.6146680333416403  | 5.008258180235766  |
| rate0-redundant | species | BUSCO    | 11.111111111111111 | 0.23635017980810868 | 5.008258180235766  |
| rate0-redundant | species | GUNC     | 99.34640522875817  | 4.980161206953943   | 5.008258180235766  |
| rate0-redundant | species | Physeter | 1.3071895424836601 | 0.8846836918623215  | 5.008258180235766  |
| rate0-redundant | species | Kraken2  | 96.73202614379085  | 4.596433622837286   | 5.008258180235766  |

|                   |         |          |                    |                      |                    |
|-------------------|---------|----------|--------------------|----------------------|--------------------|
| rate0-redundant   | species | CheckM2  | 1.3071895424836601 | 0.4133483116012959   | 5.008258180235766  |
| rate0-replacement | phylum  | CheckM   | 60.24096385542169  | 2.4228506140333854   | 2.7405731208809545 |
| rate0-replacement | phylum  | BUSCO    | 100.0              | 2.270097042264002    | 2.7405731208809545 |
| rate0-replacement | phylum  | GUNC     | 83.13253012048193  | 2.7411761428531634   | 2.7405731208809545 |
| rate0-replacement | phylum  | Physeter | 24.096385542168676 | 0.36839986350913034  | 2.7405731208809545 |
| rate0-replacement | phylum  | Kraken2  | 10.843373493975903 | 0.018144475806775695 | 2.7405731208809545 |
| rate0-replacement | phylum  | CheckM2  | 100.0              | 2.488929284161979    | 2.7405731208809545 |
| rate0-replacement | class   | CheckM   | 76.36363636363637  | 2.672664125650027    | 2.851081057089025  |
| rate0-replacement | class   | BUSCO    | 77.27272727272727  | 2.146217830384028    | 2.851081057089025  |
| rate0-replacement | class   | GUNC     | 91.81818181818183  | 2.8609219677617013   | 2.851081057089025  |
| rate0-replacement | class   | Physeter | 0                  | NA                   | 2.851081057089025  |
| rate0-replacement | class   | Kraken2  | 10.0               | 0.02926693418010551  | 2.851081057089025  |
| rate0-replacement | class   | CheckM2  | 96.36363636363636  | 2.3204636993396153   | 2.851081057089025  |
| rate0-replacement | order   | CheckM   | 70.54263565891473  | 2.718348929830576    | 2.8589954433991465 |
| rate0-replacement | order   | BUSCO    | 100.0              | 2.088465997125148    | 2.8589954433991465 |
| rate0-replacement | order   | GUNC     | 92.24806201550388  | 2.8589954433991465   | 2.8589954433991465 |
| rate0-replacement | order   | Physeter | 0                  | NA                   | 2.8589954433991465 |
| rate0-replacement | order   | Kraken2  | 16.27906976744186  | 0.3167954719175756   | 2.8589954433991465 |
| rate0-replacement | order   | CheckM2  | 97.67441860465115  | 2.2534782952096934   | 2.8589954433991465 |

|                   |         |          |                    |                      |                    |
|-------------------|---------|----------|--------------------|----------------------|--------------------|
| rate0-replacement | family  | CheckM   | 100.0              | 3.7773010142772687   | 4.151663232543372  |
| rate0-replacement | family  | BUSCO    | 100.0              | 3.537099035261738    | 4.151663232543372  |
| rate0-replacement | family  | GUNC     | 94.23076923076923  | 4.1614971120859305   | 4.151663232543372  |
| rate0-replacement | family  | Physeter | 0                  | NA                   | 4.151663232543372  |
| rate0-replacement | family  | Kraken2  | 26.923076923076923 | 0.053355342473088596 | 4.151663232543372  |
| rate0-replacement | family  | CheckM2  | 98.07692307692307  | 3.5289765857154545   | 4.151663232543372  |
| rate0-replacement | genus   | CheckM   | 100.0              | 5.13551635367378     | 5.361825783843343  |
| rate0-replacement | genus   | BUSCO    | 100.0              | 4.578141603203857    | 5.361825783843343  |
| rate0-replacement | genus   | GUNC     | 100.0              | 5.361825783843343    | 5.361825783843343  |
| rate0-replacement | genus   | Physeter | 4.761904761904762  | 0.34935489267373     | 5.361825783843343  |
| rate0-replacement | genus   | Kraken2  | 53.96825396825397  | 2.5090024296601556   | 5.361825783843343  |
| rate0-replacement | genus   | CheckM2  | 100.0              | 4.642534208737596    | 5.361825783843343  |
| rate0-replacement | species | CheckM   | 100.0              | 4.948345885778904    | 5.2731246552877575 |
| rate0-replacement | species | BUSCO    | 100.0              | 4.282675557042158    | 5.2731246552877575 |
| rate0-replacement | species | GUNC     | 100.0              | 5.2731246552877575   | 5.2731246552877575 |
| rate0-replacement | species | Physeter | 2.6143790849673203 | 0.8762394590079698   | 5.2731246552877575 |
| rate0-replacement | species | Kraken2  | 97.38562091503267  | 4.924367217932163    | 5.2731246552877575 |
| rate0-replacement | species | CheckM2  | 99.34640522875817  | 4.64342400971791     | 5.2731246552877575 |
| rate0-single      | phylum  | CheckM   | 98.11320754716981  | 2.753690553138729    | 4.113109358121008  |

|              |        |          |                    |                      |                   |
|--------------|--------|----------|--------------------|----------------------|-------------------|
| rate0-single | phylum | BUSCO    | 100.0              | 3.3615234871499187   | 4.113109358121008 |
| rate0-single | phylum | GUNC     | 62.264150943396224 | 4.063274297657863    | 4.113109358121008 |
| rate0-single | phylum | Physeter | 24.528301886792452 | 2.459039899001997    | 4.113109358121008 |
| rate0-single | phylum | Kraken2  | 5.660377358490567  | 0.033283677383916466 | 4.113109358121008 |
| rate0-single | phylum | CheckM2  | 96.22641509433963  | 3.01100625585747     | 4.113109358121008 |
| rate0-single | class  | CheckM   | 100.0              | 3.3957506248593834   | 4.756249845972857 |
| rate0-single | class  | BUSCO    | 100.0              | 3.8280322020257986   | 4.756249845972857 |
| rate0-single | class  | GUNC     | 66.94214876033058  | 4.762033999079752    | 4.756249845972857 |
| rate0-single | class  | Physeter | 0                  | NA                   | 4.756249845972857 |
| rate0-single | class  | Kraken2  | 22.31404958677686  | 2.330137377753667    | 4.756249845972857 |
| rate0-single | class  | CheckM2  | 99.17355371900827  | 3.67103717395642     | 4.756249845972857 |
| rate0-single | order  | CheckM   | 100.0              | 3.3533254432998714   | 4.444640457488092 |
| rate0-single | order  | BUSCO    | 100.0              | 3.577603145395972    | 4.444640457488092 |
| rate0-single | order  | GUNC     | 69.49152542372882  | 4.49297240404319     | 4.444640457488092 |
| rate0-single | order  | Physeter | 0                  | NA                   | 4.444640457488092 |
| rate0-single | order  | Kraken2  | 19.491525423728813 | 0.04549892840277536  | 4.444640457488092 |
| rate0-single | order  | CheckM2  | 96.61016949152543  | 3.5852017761205186   | 4.444640457488092 |
| rate0-single | family | CheckM   | 100.0              | 3.8815283203406183   | 4.73017412136555  |
| rate0-single | family | BUSCO    | 100.0              | 4.027079880569484    | 4.73017412136555  |

|              |         |          |                    |                    |                    |
|--------------|---------|----------|--------------------|--------------------|--------------------|
| rate0-single | family  | GUNC     | 89.39393939393939  | 4.511252493568201  | 4.73017412136555   |
| rate0-single | family  | Physeter | 0                  | NA                 | 4.73017412136555   |
| rate0-single | family  | Kraken2  | 16.666666666666666 | 0.5812524935682011 | 4.73017412136555   |
| rate0-single | family  | CheckM2  | 100.0              | 3.892943683145122  | 4.73017412136555   |
| rate0-single | genus   | CheckM   | 91.30434782608695  | 1.341065010205717  | 1.6826151227745412 |
| rate0-single | genus   | BUSCO    | 88.40579710144928  | 0.8779338870099609 | 1.6826151227745412 |
| rate0-single | genus   | GUNC     | 94.20289855072464  | 1.6586791330048318 | 1.6826151227745412 |
| rate0-single | genus   | Physeter | 0                  | NA                 | 1.6826151227745412 |
| rate0-single | genus   | Kraken2  | 33.33333333333333  | 0.7395275004820205 | 1.6826151227745412 |
| rate0-single | genus   | CheckM2  | 92.02898550724638  | 1.1865059793997539 | 1.6826151227745412 |
| rate0-single | species | CheckM   | 81.30841121495327  | 0.9039737079849057 | 1.017128662251577  |
| rate0-single | species | BUSCO    | 57.943925233644855 | 0.6150415134750611 | 1.017128662251577  |
| rate0-single | species | GUNC     | 97.19626168224299  | 1.0152493692973965 | 1.017128662251577  |
| rate0-single | species | Physeter | 0                  | NA                 | 1.017128662251577  |
| rate0-single | species | Kraken2  | 85.04672897196261  | 0.6839737079849058 | 1.017128662251577  |
| rate0-single | species | CheckM2  | 73.83177570093457  | 0.6048218745330745 | 1.017128662251577  |

**Table S4: Underdetection of the tools.**
